# Supplementary material for: Cu-catalyzed coupling-cyclization in PEG 400 under ultrasound: a highly selective and greener approach towards isocoumarins
Source: Royal Society of Chemistry journal article supplement (doi:10.1039/c3ra40969d), 2013-01-01
Supplement: c3ra40969d_2.pdf [file c3ra40969d_2.pdf]

## Copies of spectra

MNR-400MHz  
AR.No:ME0812/1879  
Analyst: Ganesh  
Date: 23rd Aug. 2012

NUCLEUS : H1  
FRQ (MHz): 400.23  
EXP : s2pul

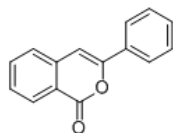

**3-phenyl-1H-isochromen-1-one**  
Chemical Formula: C<sub>15</sub>H<sub>10</sub>O<sub>2</sub>  
Exact Mass: 222.07

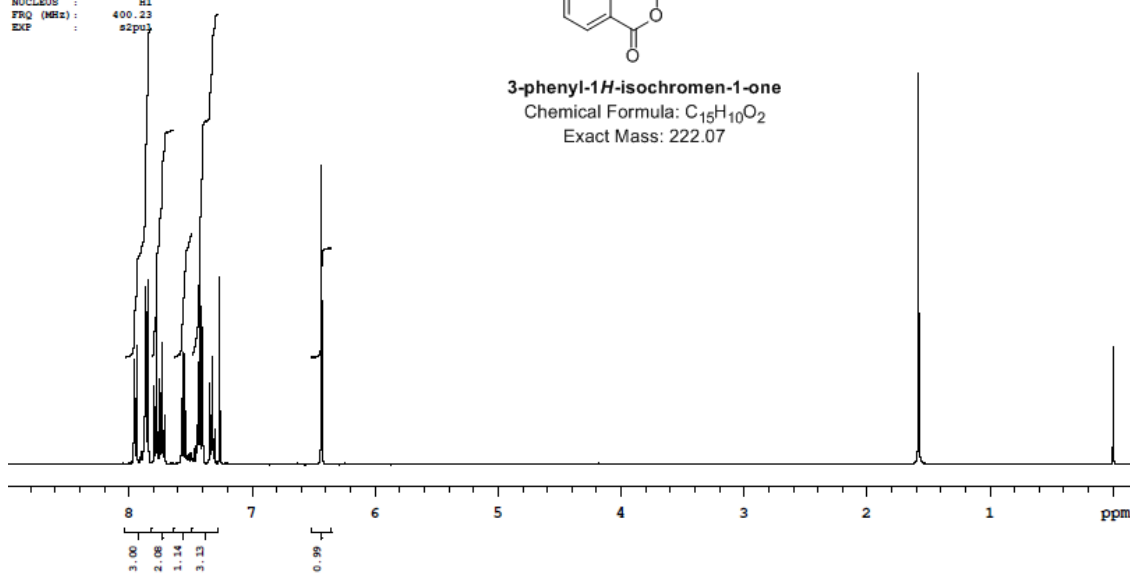

Analyst: Haribabu  
Date: 3rd Sep. 2012

NUCLEUS : C13  
FRQ (MHz): 100.65  
EXP : s2pul

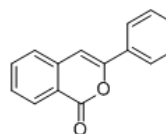

**3-phenyl-1H-isochromen-1-one**  
Chemical Formula: C<sub>15</sub>H<sub>10</sub>O<sub>2</sub>  
Exact Mass: 222.07

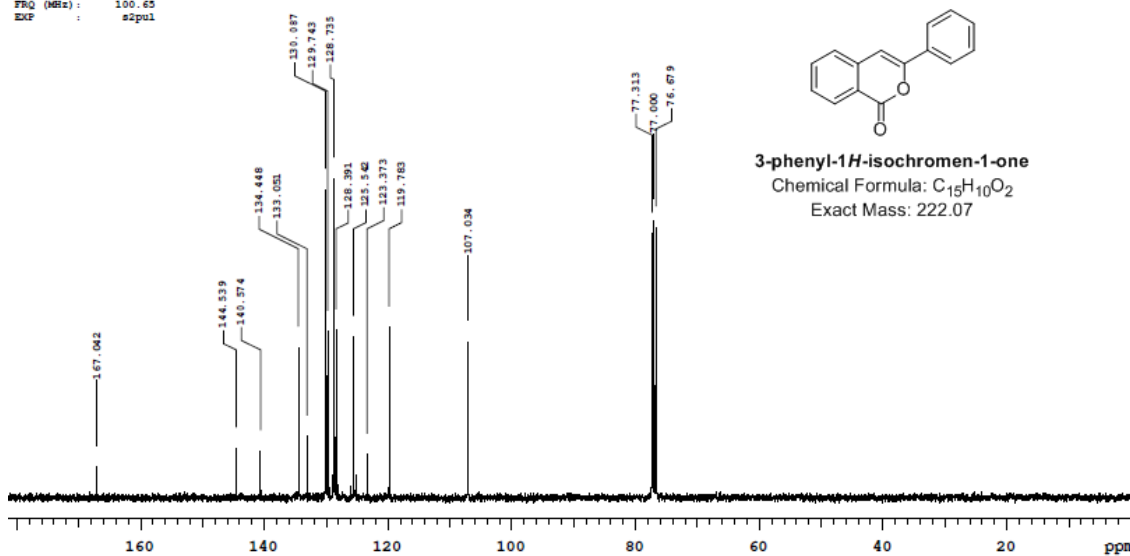

Elemental Composition Report

Page 1

Single Mass Analysis

Tolerance = 5.0 PPM / DBE: min = -1.5, max = 80.0  
 Element prediction: Off  
 Number of isotope peaks used for i-FIT = 3

Monoisotopic Mass, Even Electron Ions  
 38 formula(e) evaluated with 1 results within limits (up to 4 best isotopic matches for each mass)  
 Elements Used:  
 C: 0-25 H: 0-28 N: 0-4 O: 0-2  
 A508-VIKKY1-048  
 UT1211\_072 15 (0.278) Cm (14:16-57:61x0.010)

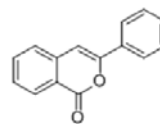

**3-phenyl-1H-isochromen-1-one**  
 Chemical Formula: C<sub>15</sub>H<sub>10</sub>O<sub>2</sub>  
 Exact Mass: 222.07

1: TOF MS ES+  
 9.98e+002

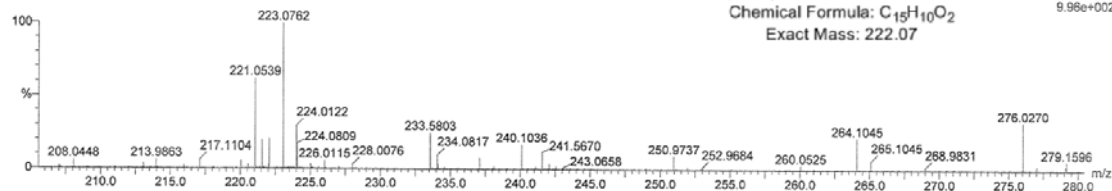

| Minimum: | 5.0        | 5.0 | -1.5 |      |       |            |
|----------|------------|-----|------|------|-------|------------|
| Maximum: |            |     | 80.0 |      |       |            |
| Mass     | Calc. Mass | mDa | PPM  | DBE  | i-FIT | Formula    |
| 223.0762 | 223.0759   | 0.3 | 1.3  | 10.5 | 2.2   | C15 H11 O2 |

TDC-J-04 A508-VIKKY5-053 in CDCl3  
 NMR-400MHz  
 AR.No:ME0912/751  
 Analyst: Ganesh  
 Date: 10 th Sep2012

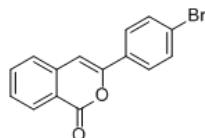

**3-(4-bromophenyl)-1H-isochromen-1-one**  
 Chemical Formula: C<sub>15</sub>H<sub>9</sub>BrO<sub>2</sub>  
 Exact Mass: 299.98

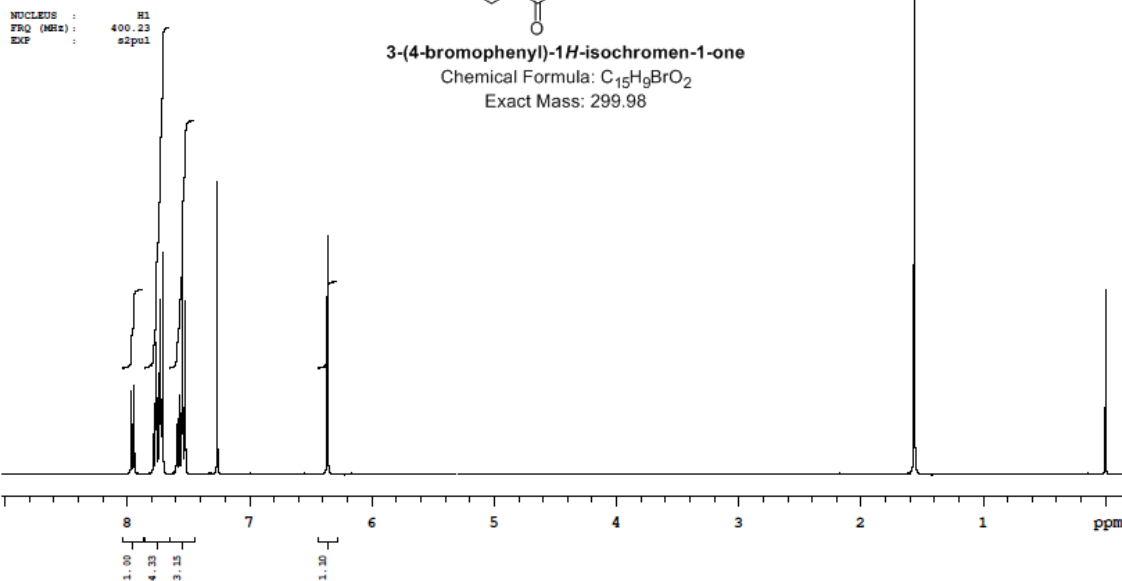

NMR-400MHz  
 AR.No:ME0912/1406  
 Analyst:Haribabu  
 Date: 14 th Sep2012

NUCLEUS : C13  
 FREQ (MHz): 100.65  
 EXP : s2pul

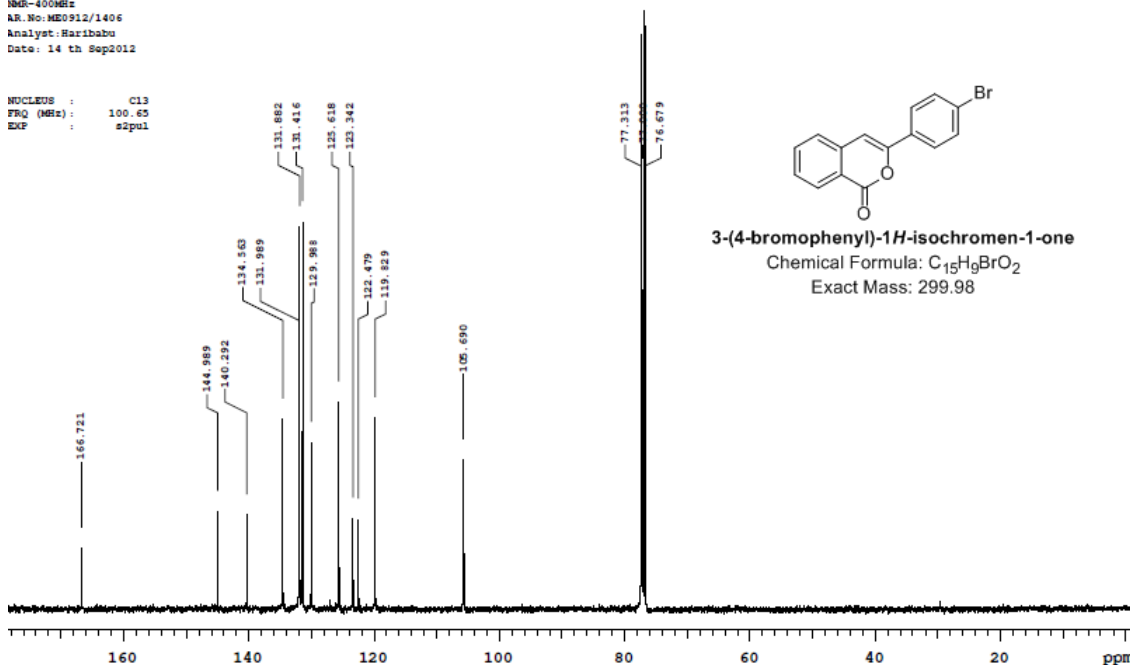

Elemental Composition Report

Page 1

Single Mass Analysis

Tolerance = 5.0 PPM / DBE: min = -1.5, max = 80.0  
 Element prediction: Off  
 Number of isotope peaks used for i-FIT = 2

Monoisotopic Mass, Even Electron Ions  
 6 formula(e) evaluated with 1 results within limits (up to 5 closest results for each mass)  
 Elements Used:  
 C: 0-20 H: 0-20 O: 0-2 Br: 0-1

A508/CV1K5/053B  
 130211012 16 (0.292) Cm (6:28)

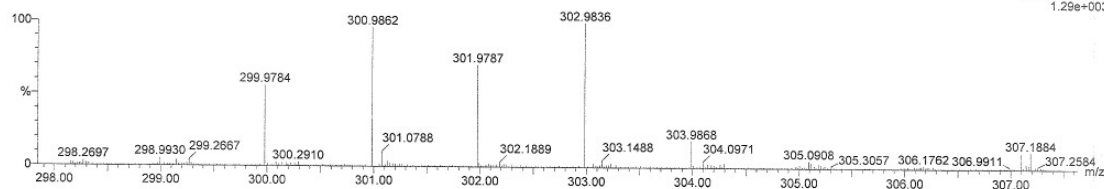

Gajanan  
 1: TOF MS ES+  
 1.29e+003

| Mass     | Calc. Mass | mDa  | PPM  | DBE  | i-FIT | Formula       |
|----------|------------|------|------|------|-------|---------------|
| 300.9862 | 300.9864   | -0.2 | -0.7 | 10.5 | 237.3 | C15 H10 O2 Br |

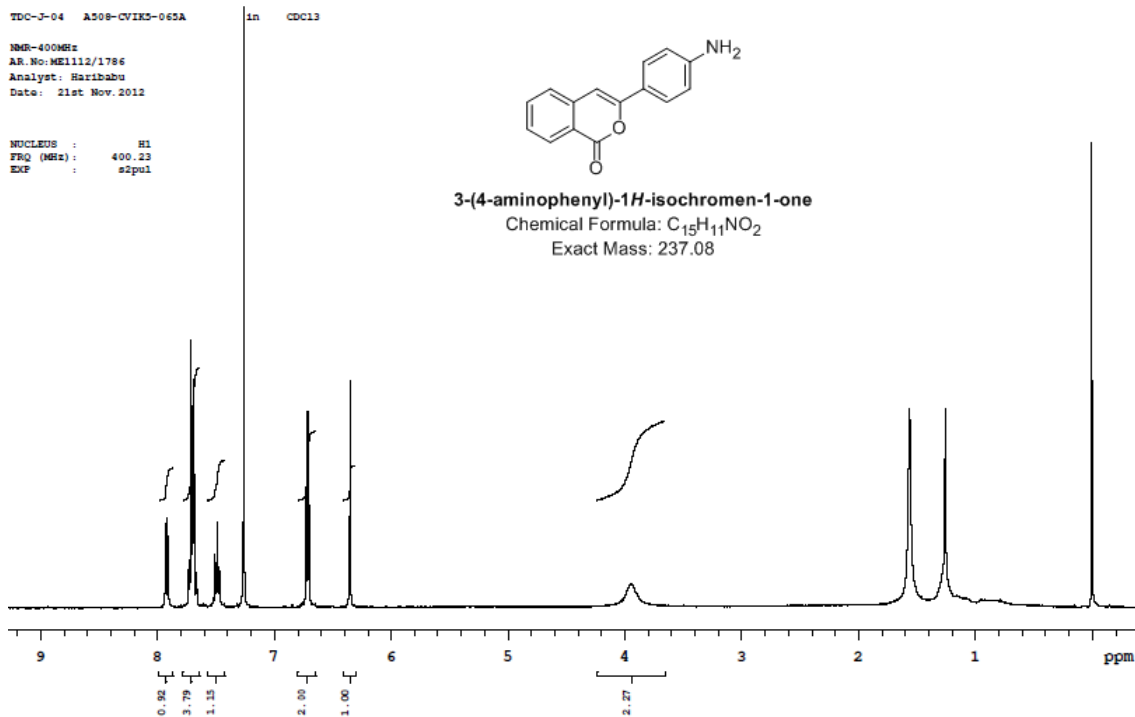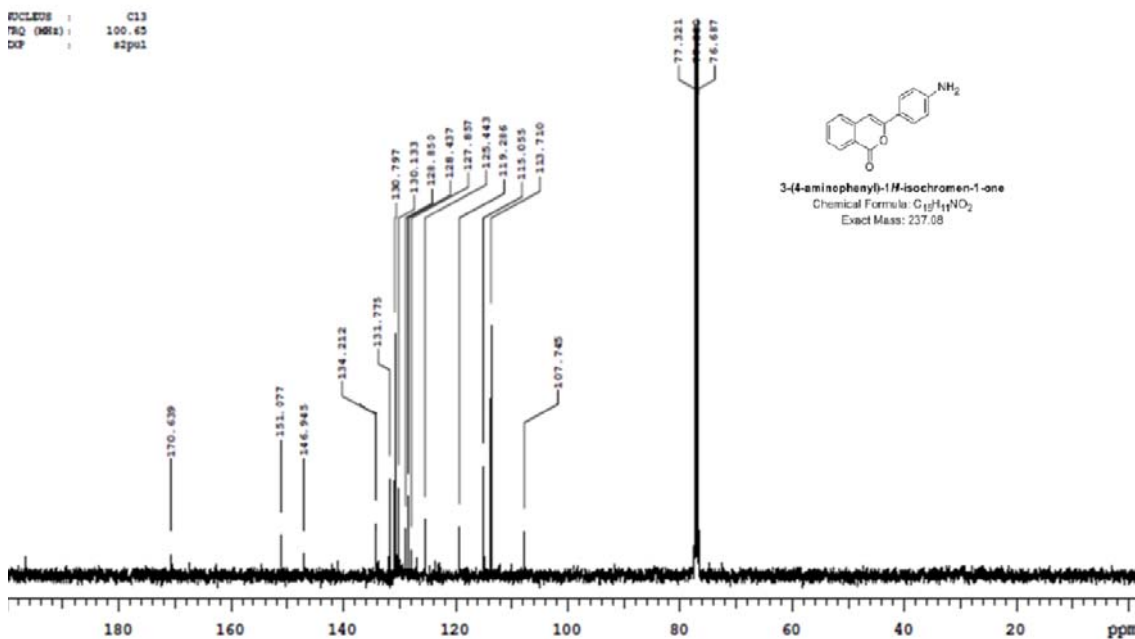

Elemental Composition Report

Single Mass Analysis

Tolerance = 5.0 PPM / DBE: min = -1.5, max = 80.0  
 Element prediction: Off  
 Number of isotope peaks used for i-FIT = 3

Monoisotopic Mass, Even Electron Ions  
 102 formula(e) evaluated with 1 results within limits (up to 5 best isotopic matches for each mass)  
 Elements Used:  
 C: 0-25 H: 0-25 N: 0-1 O: 0-7 Cl: 0-2  
 A508/CVIK15/065 A  
 1: TOF MS ES+

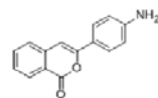

**3-(4-aminophenyl)-1H-isochromen-1-one**  
 Chemical Formula: C<sub>15</sub>H<sub>11</sub>NO<sub>2</sub>  
 Exact Mass: 237.08

UT1211\_121 20 (0.367) Cm (15:28-57:77x0.010)

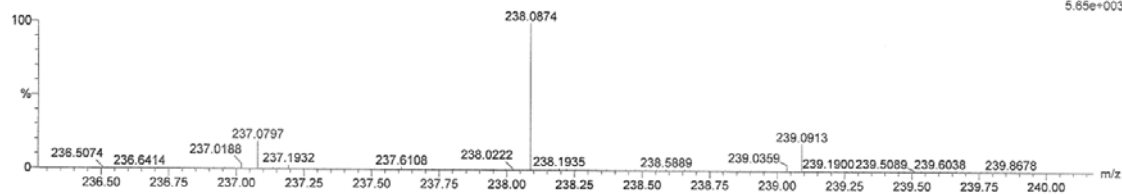

| Mass     | Calc. Mass | mDa | PPM | DBE  | i-FIT | Formula      |
|----------|------------|-----|-----|------|-------|--------------|
| 238.0874 | 238.0868   | 0.6 | 2.5 | 10.5 | n/a   | C15 H12 N O2 |

TDC-J-04 A508-CVIR8-072 in CDCl3

MR-400MHz  
 AR.No:ME1012/2702  
 Analyst:Ganesh  
 Date:29th Oct. 2012

NUCLEUS : H1  
 FRQ (MHz): 400.23  
 EXP : s2pul

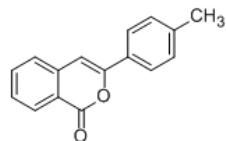

**3-(p-tolyl)-1H-isochromen-1-one**  
 Chemical Formula: C<sub>16</sub>H<sub>12</sub>O<sub>2</sub>  
 Exact Mass: 236.08

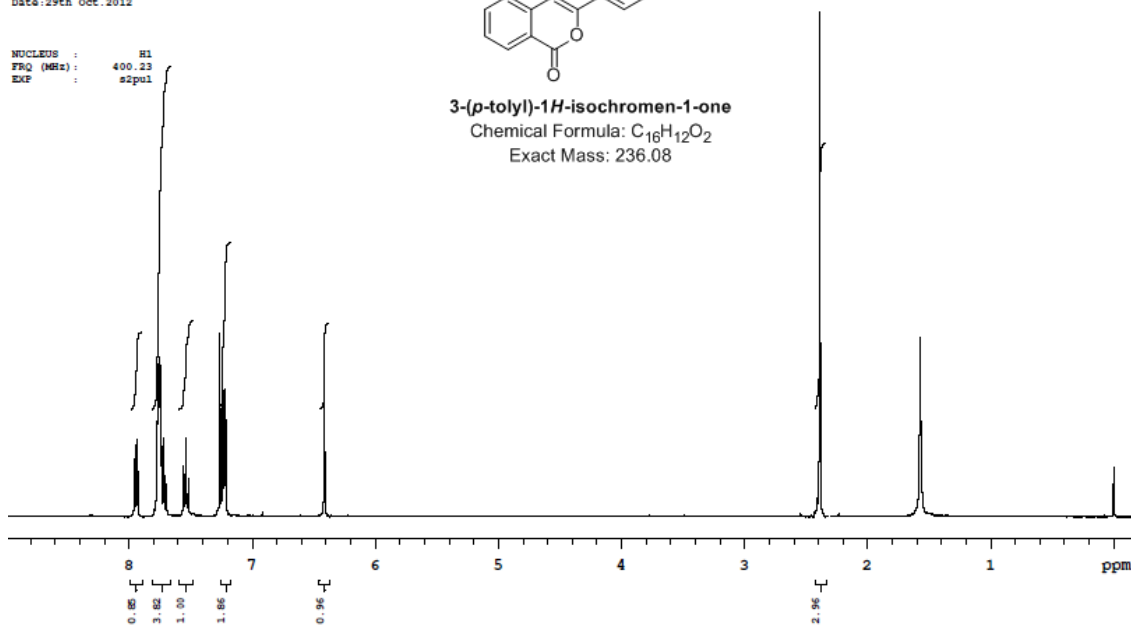

TDC-J-04 A508-CVIK18-072 in CDCl3

MR-400MHz  
 AR No: ME1012/3045  
 Analyst: Ganesh  
 Date: 31st Oct. 201

NUCLEUS : C13  
 FREQ (MHz): 100.63  
 EXP : s1pul

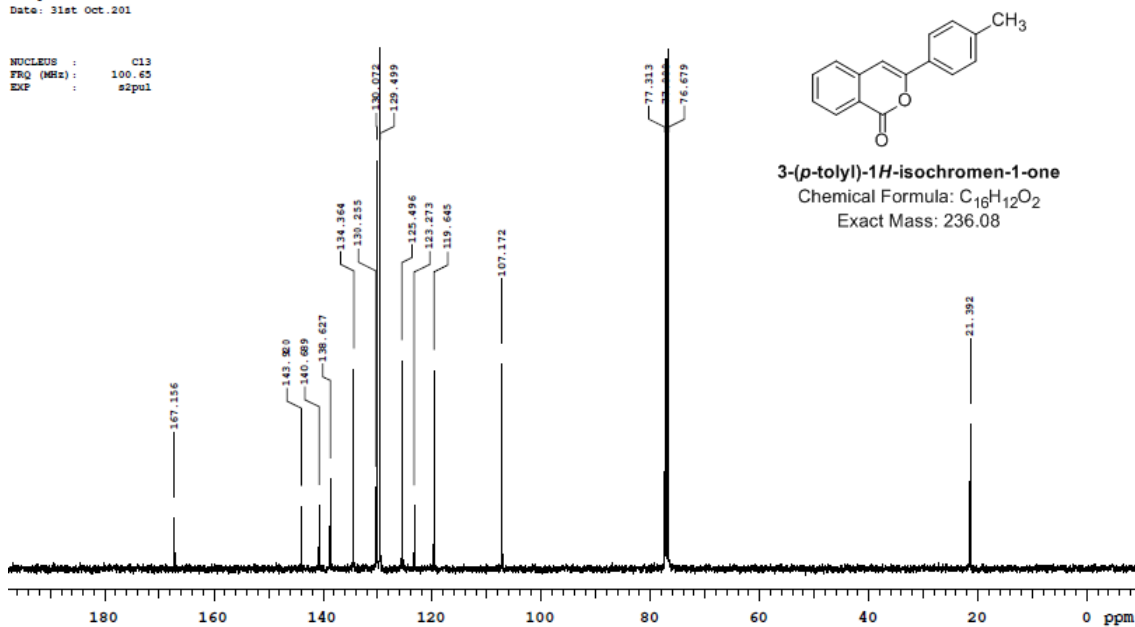

Elemental Composition Report

Single Mass Analysis

Tolerance = 10.0 PPM / DBE: min = -1.5, max = 80.0  
 Element prediction: Off  
 Number of isotope peaks used for i-FIT = 3

Monoisotopic Mass, Even Electron Ions  
 20 formula(e) evaluated with 1 results within limits (up to 5 best isotopic matches for each mass)  
 Elements Used:  
 C: 0-27 H: 0-30 O: 0-7  
 A508/CVIK18/072  
 1: TOF MS ES+

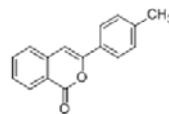

**3-(p-tolyl)-1H-isochromen-1-one**  
 Chemical Formula: C<sub>16</sub>H<sub>12</sub>O<sub>2</sub>  
 Exact Mass: 236.08

Page 1

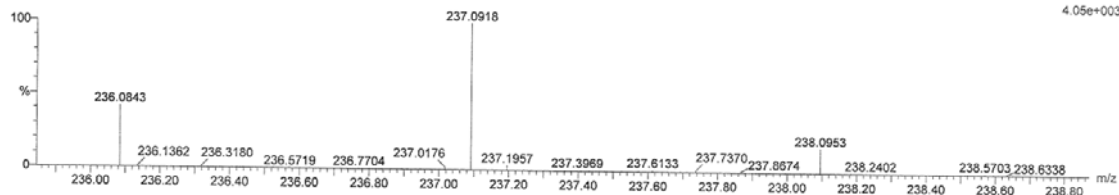

Minimum: -1.5  
 Maximum: 80.0

| Mass     | Calc. Mass | mDa | PPM | DBE  | i-FIT | Formula                                        |
|----------|------------|-----|-----|------|-------|------------------------------------------------|
| 237.0918 | 237.0916   | 0.2 | 0.8 | 10.5 | n/a   | C <sub>16</sub> H <sub>13</sub> O <sub>2</sub> |

UT1211\_124 20 (0.366) Cm (20.27-45.71x0.010)

4.05e+003

NMR-400MHz  
AR.No:ME1112/201  
Analyst: Ganesh  
Date:05th Nov.2012

NUCLEUS : <sup>1</sup>H  
FREQ (MHz) : 400.12  
EXP : s2pul

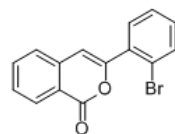

**3-(2-bromophenyl)-1H-isochromen-1-one**

Chemical Formula: C<sub>15</sub>H<sub>9</sub>BrO<sub>2</sub>

Exact Mass: 299.98

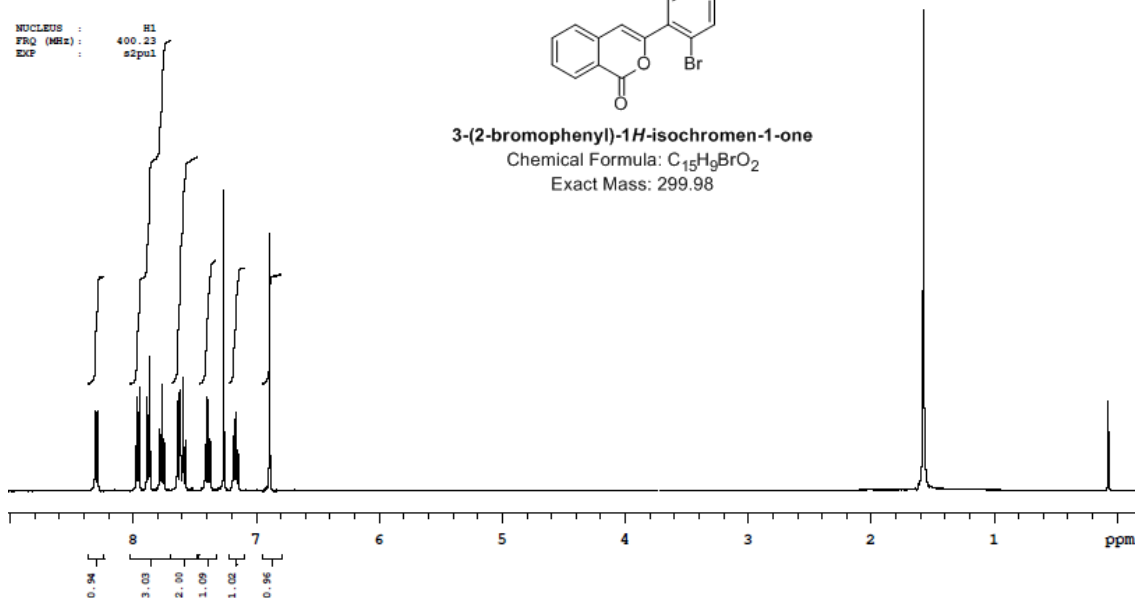

NMR-400MHz  
AR.No:ME1112/272  
Analyst: Haribabu  
Date:09th Nov.2012

NUCLEUS : <sup>13</sup>C  
FREQ (MHz) : 100.63  
EXP : s2pul

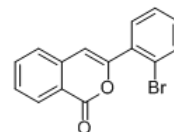

**3-(2-bromophenyl)-1H-isochromen-1-one**

Chemical Formula: C<sub>15</sub>H<sub>9</sub>BrO<sub>2</sub>

Exact Mass: 299.98

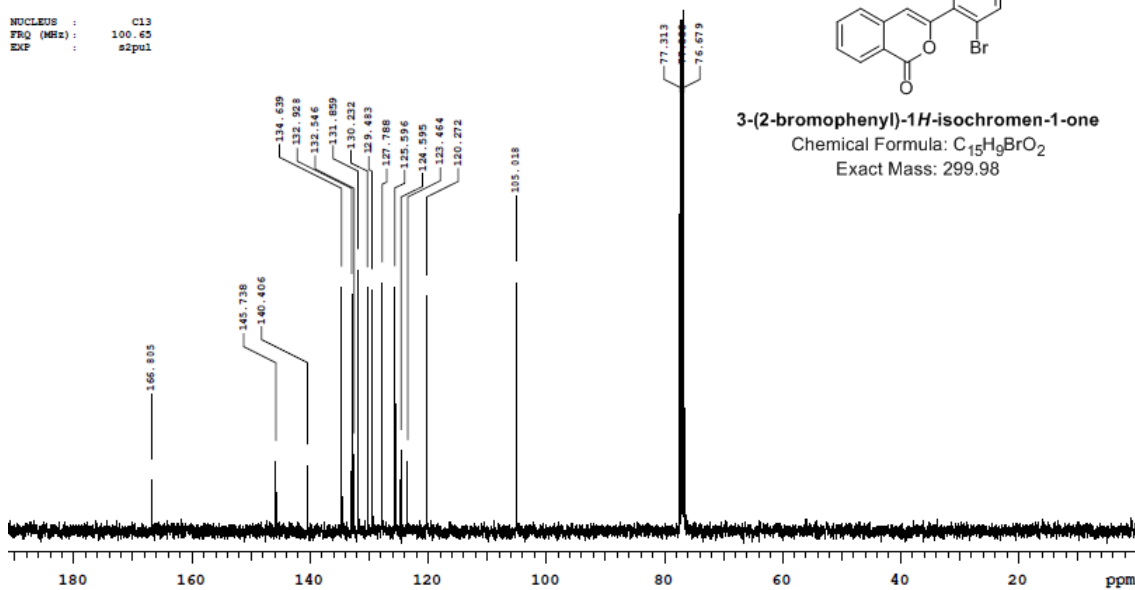

Elemental Composition Report

Page 1

Single Mass Analysis

Tolerance = 5.0 PPM / DBE: min = -1.5, max = 80.0  
 Element prediction: Off  
 Number of isotope peaks used for i-FIT = 2

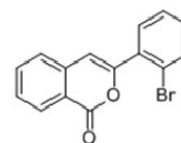

**3-(2-bromophenyl)-1H-isochromen-1-one**  
 Chemical Formula: C<sub>15</sub>H<sub>9</sub>BrO<sub>2</sub>  
 Exact Mass: 299.98

Monoisotopic Mass, Even Electron Ions  
 27 formula(e) evaluated with 1 results within limits (up to 5 closest results for each mass)  
 Elements Used:  
 C: 0-30 H: 0-30 O: 0-4 Br: 0-1

A508/CVIK19/073B  
 130211014 19 (0.353) Cm (19.34)

Gajanan  
 1: TOF MS ES+  
 4.31e+002

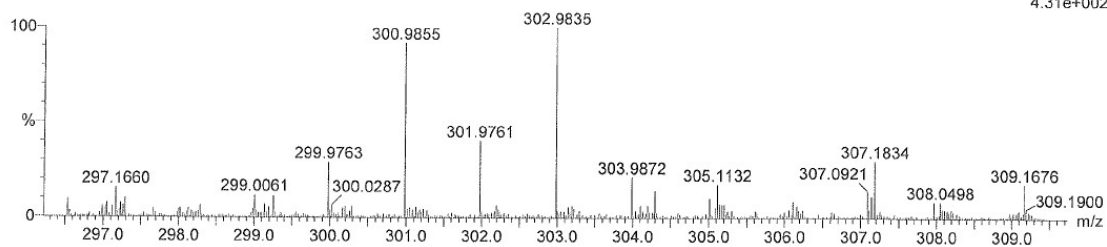

Minimum: -1.5  
 Maximum: 5.0 5.0 80.0

| Mass     | Calc. Mass | mDa  | PPM  | DBE  | i-FIT | Formula       |
|----------|------------|------|------|------|-------|---------------|
| 300.9855 | 300.9864   | -0.9 | -3.0 | 10.5 | 53.9  | C15 H10 O2 Br |

TDCJ-04 A508/CVIK2/050B in CDCl<sub>3</sub>

MR-400MHz  
 AR.No: ME1112/1017  
 Analyst: Haribabu  
 Date: 14th Nov. 2012

NUCLEUS : H1  
 FREQ (MHz): 400.23  
 EXP : s2pul

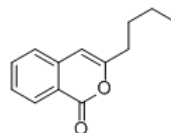

**3-butyl-1H-isochromen-1-one**  
 Chemical Formula: C<sub>13</sub>H<sub>14</sub>O<sub>2</sub>  
 Exact Mass: 202.10

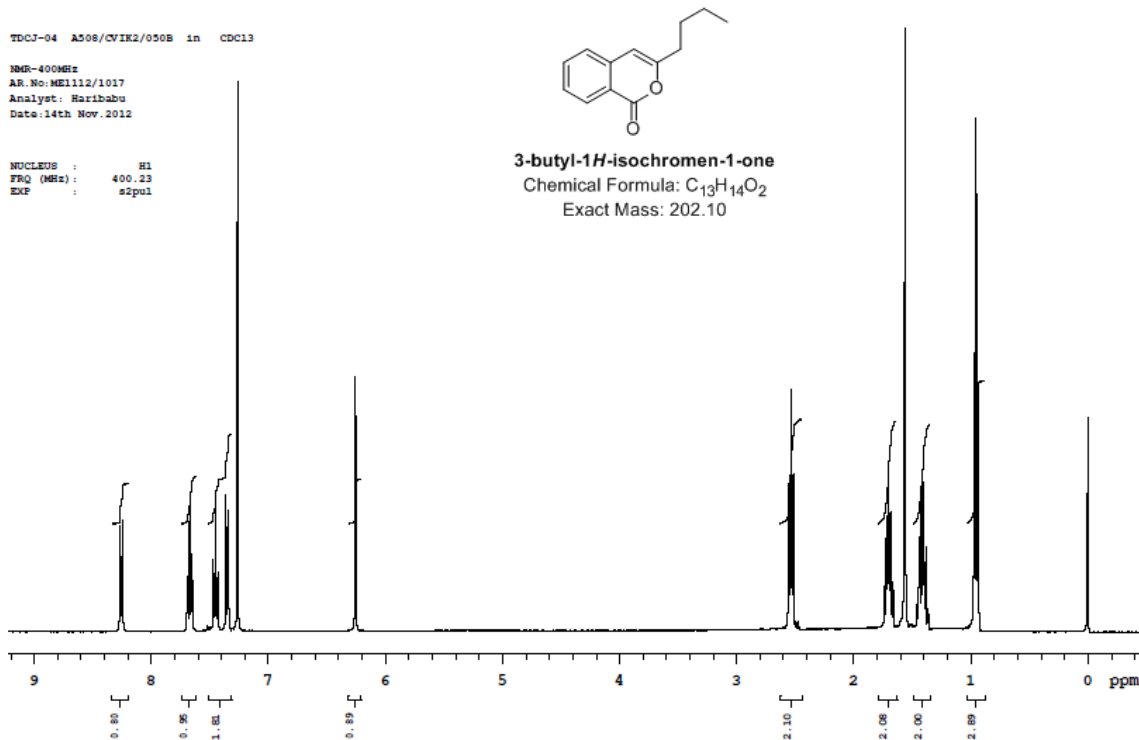



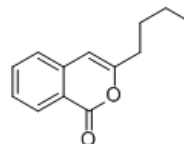

TQC-3-04 A508-CVIX2-050b in cdc13  
 NMR-400MHz  
 AN. NO: HELL12/1534  
 Analyst: MArribabu  
 Date: 19th Nov. 2012

**3-butyl-1H-isochromen-1-one**  
 Chemical Formula: C<sub>13</sub>H<sub>14</sub>O<sub>2</sub>  
 Exact Mass: 202.10

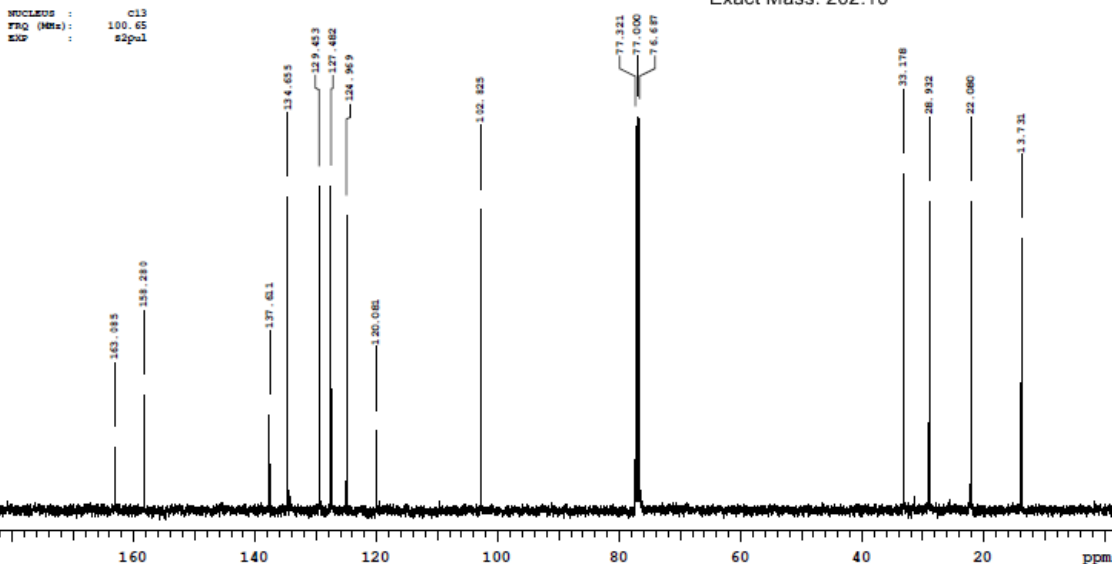

**Elemental Composition Report**

Page 1

**Single Mass Analysis**

Tolerance = 5.0 PPM / DBE: min = -1.5, max = 80.0  
 Element prediction: Off  
 Number of isotope peaks used for i-FIT = 3

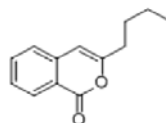

**3-butyl-1H-isochromen-1-one**  
 Chemical Formula: C<sub>13</sub>H<sub>14</sub>O<sub>2</sub>  
 Exact Mass: 202.10

1: TOF MS ES+  
 2.97e+004

Monoisotopic Mass, Even Electron Ions  
 38 formula(e) evaluated with 1 results within limits (up to 4 best isotopic matches for each mass)  
 Elements Used:  
 C: 0-25 H: 0-28 N: 0-4 O: 0-2  
 A508-VIKKY1-050 B  
 UT1211\_073 13 (0.251) Cm (13.22-69:79x0.010)

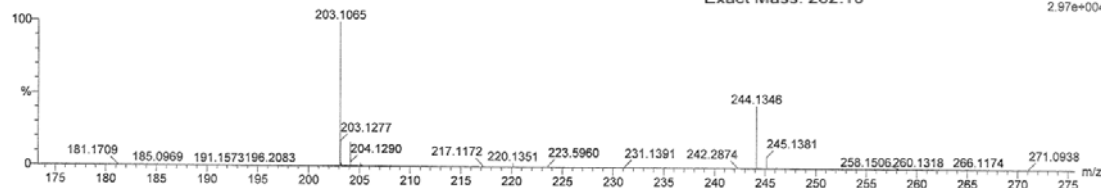

| Mass     | Calc. Mass | mDa  | PPM  | DBE | i-FIT | Formula    |
|----------|------------|------|------|-----|-------|------------|
| 203.1065 | 203.1072   | -0.7 | -3.4 | 6.5 | 38.7  | C13 H15 O2 |

TDCJ-04 A508/CVIK4/052B in CDCl3

NMR-400MHz  
AR.No:ME1112/1018  
Analyst: Haribabu  
Date:14th Nov.2012

NUCLEUS : H1  
FRQ (MHz): 400.23  
EXP : s2pul

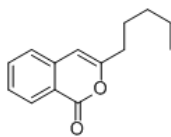

**3-pentyl-1H-isochromen-1-one**  
Chemical Formula: C<sub>14</sub>H<sub>16</sub>O<sub>2</sub>  
Exact Mass: 216.12

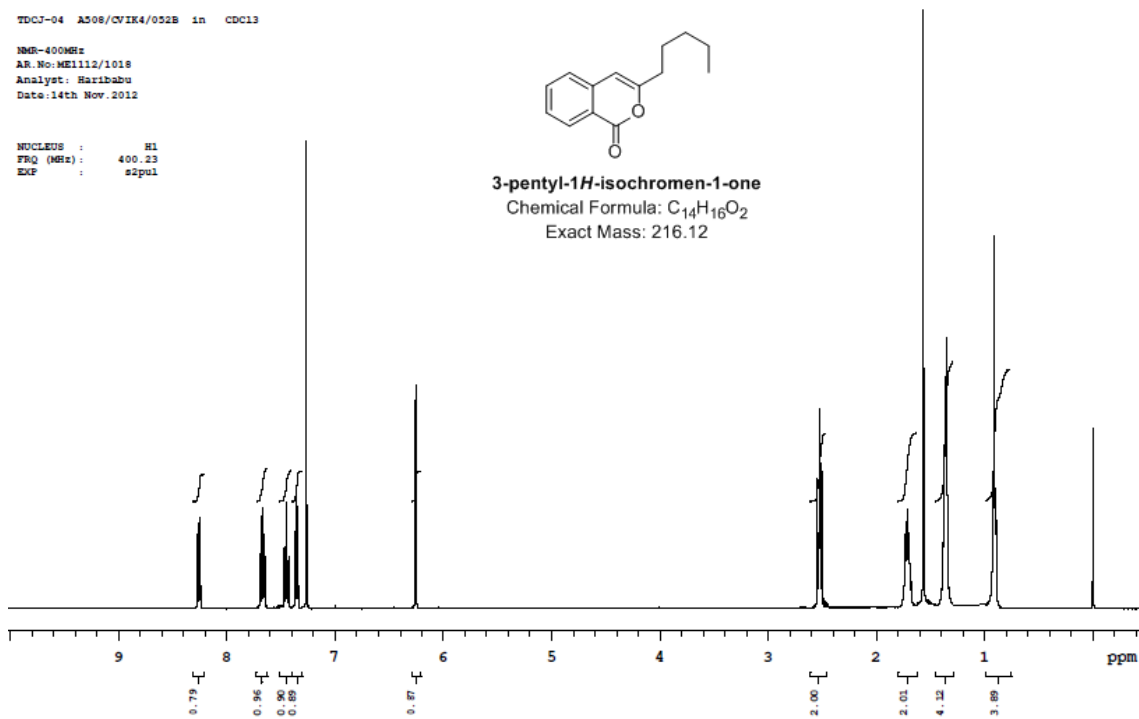

TDC-3-04 A508-CVIK4-052B1 in CDCl3

NMR-400MHz  
AR.No:ME1112/2110  
Analyst: Ganesh  
Date: 23rd Nov.2012

NUCLEUS : C13  
FRQ (MHz): 100.65  
EXP : s2pul

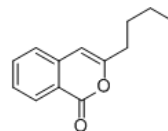

**3-pentyl-1H-isochromen-1-one**  
Chemical Formula: C<sub>14</sub>H<sub>16</sub>O<sub>2</sub>  
Exact Mass: 216.12

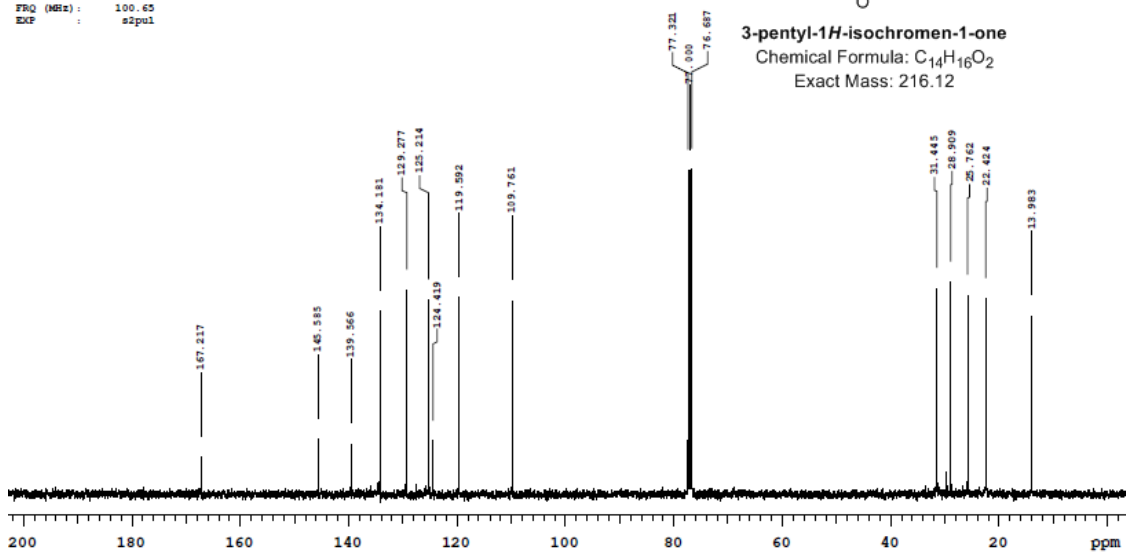

### Elemental Composition Report

#### Single Mass Analysis

Tolerance = 10.0 PPM / DBE: min = -1.5, max = 80.0  
Element prediction: Off  
Number of isotope peaks used for i-FIT = 3

Monoisotopic Mass, Even Electron Ions  
74 formula(e) evaluated with 1 results within limits (up to 5 best isotopic matches for each mass)  
Elements Used:  
C: 0-25 H: 0-25 N: 0-3 O: 0-7  
A508/CVIK4/052 B  
1: TOF MS ES+

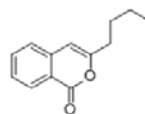

**3-pentyl-1H-isochromen-1-one**  
Chemical Formula: C<sub>14</sub>H<sub>16</sub>O<sub>2</sub>  
Exact Mass: 216.12

Page 1

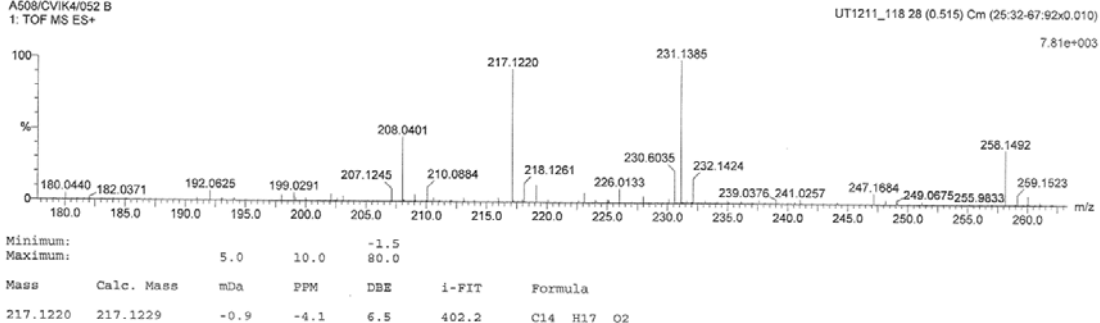

TDCJ-04 A508/CVIK3/051B in CDC13

NMR-400MHz  
AR.No:ME1112/1015  
Analyst: Haribabu  
Date:14th Nov.2012

NUCLEUS : H1  
FRQ (MHz): 400.23  
EXP : s2pul

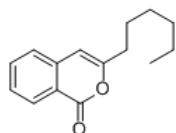

**3-hexyl-1H-isochromen-1-one**  
Chemical Formula: C<sub>15</sub>H<sub>18</sub>O<sub>2</sub>  
Exact Mass: 230.13

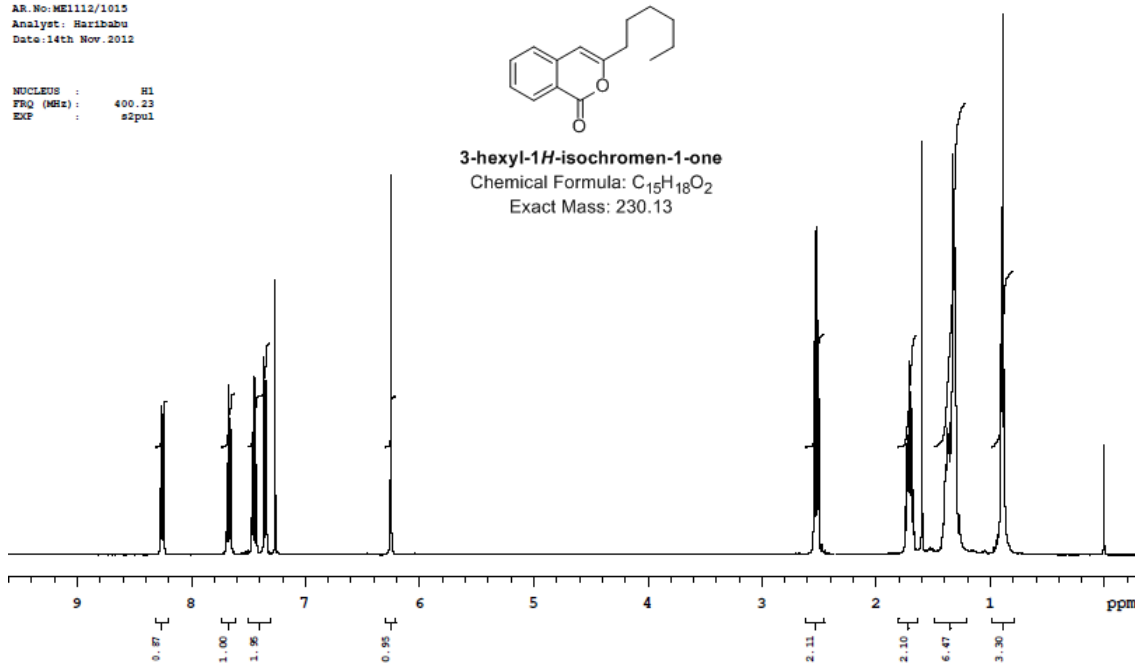

TDC-J-04 A508-CVIX3-051a in cocl3

MSM-400MHz  
 AN: NO: ME1112/1535  
 Analyst: Maribabu  
 Date: 19th Nov. 2012

NUCLEUS : c13  
 FREQ (MHz): 100.65  
 EXP : sqpul

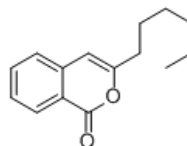

**3-hexyl-1H-isochromen-1-one**

Chemical Formula: C<sub>15</sub>H<sub>18</sub>O<sub>2</sub>

Exact Mass: 230.13

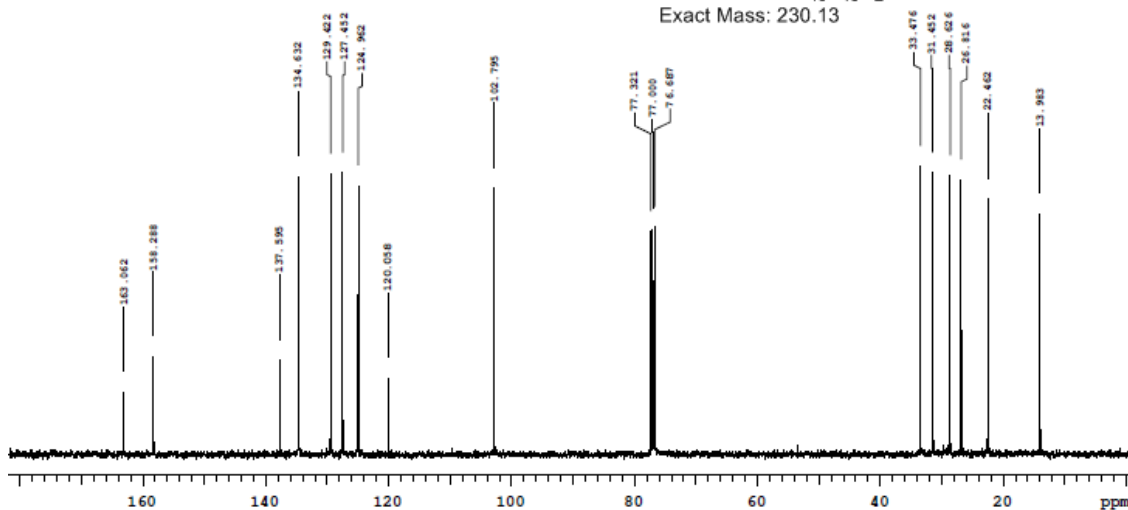

**Elemental Composition Report**

**Single Mass Analysis**

Tolerance = 10.0 PPM / DBE: min = -1.5, max = 80.0

Element prediction: Off

Number of isotope peaks used for i-FIT = 3

Monoisotopic Mass, Even Electron Ions

75 formula(e) evaluated with 1 results within limits (up to 5 best isotopic matches for each mass)

Elements Used:

C: 0-25 H: 0-25 N: 0-3 O: 0-7

A508/CVIX3/051 B

1: TOF MS ES+

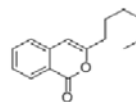

**3-hexyl-1H-isochromen-1-one**

Chemical Formula: C<sub>15</sub>H<sub>18</sub>O<sub>2</sub>

Exact Mass: 230.13

UT1211\_117 32 (0.587) Cm (32:36-85:92x0.010)

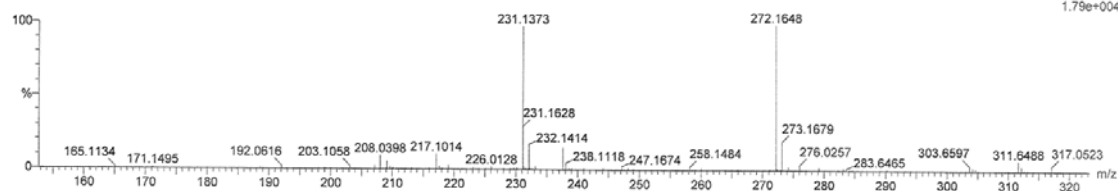

Minimum: -1.5  
 Maximum: 5.0 10.0 80.0

| Mass     | Calc. Mass | mDa  | PPM  | DBE | i-FIT | Formula    |
|----------|------------|------|------|-----|-------|------------|
| 231.1373 | 231.1385   | -1.2 | -5.2 | 6.5 | 8.9   | C15 H19 O2 |

1.79e+004

TDC-J-04 A508-CVIK6-054C in CDCl3

900MHz  
AR.No:ME1112/1441  
Analyst: Ganesh  
Date: 19th Nov. 2012

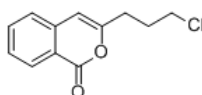

**3-(3-chloropropyl)-1H-isochromen-1-one**

Chemical Formula: C<sub>12</sub>H<sub>11</sub>ClO<sub>2</sub>

Exact Mass: 222.04

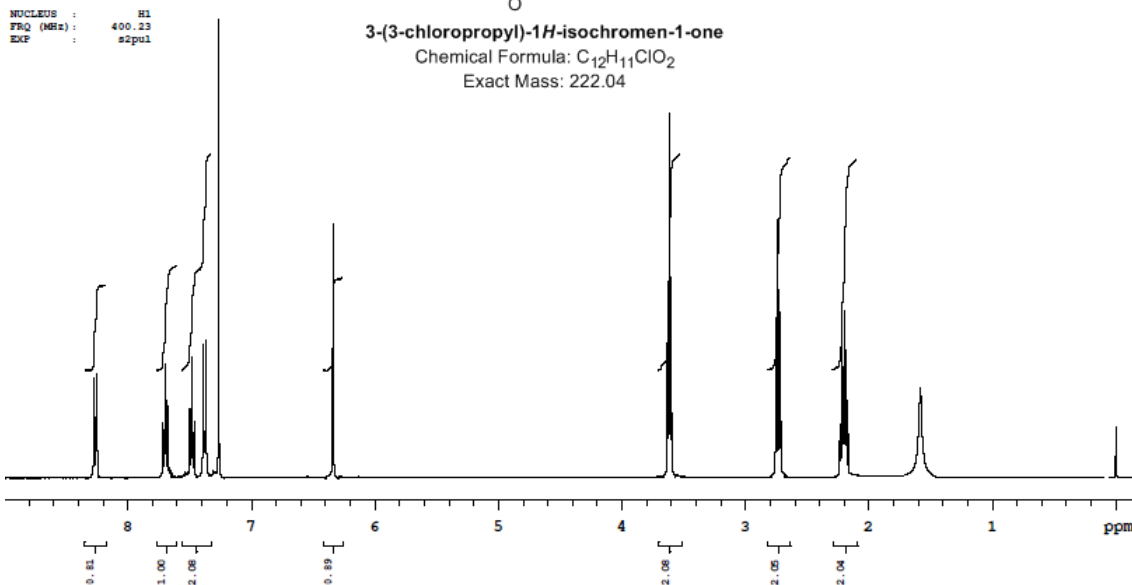

TDC-J-04 A508-CVIK6-054B in CDCl3

900MHz  
AR.No:ME1112/2111  
Analyst: Ganesh  
Date: 23rd Nov. 2012

NUCLEUS : C13  
FRQ (MHz): 100.63  
EXP : s2pul

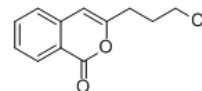

**3-(3-chloropropyl)-1H-isochromen-1-one**

Chemical Formula: C<sub>12</sub>H<sub>11</sub>ClO<sub>2</sub>

Exact Mass: 222.04

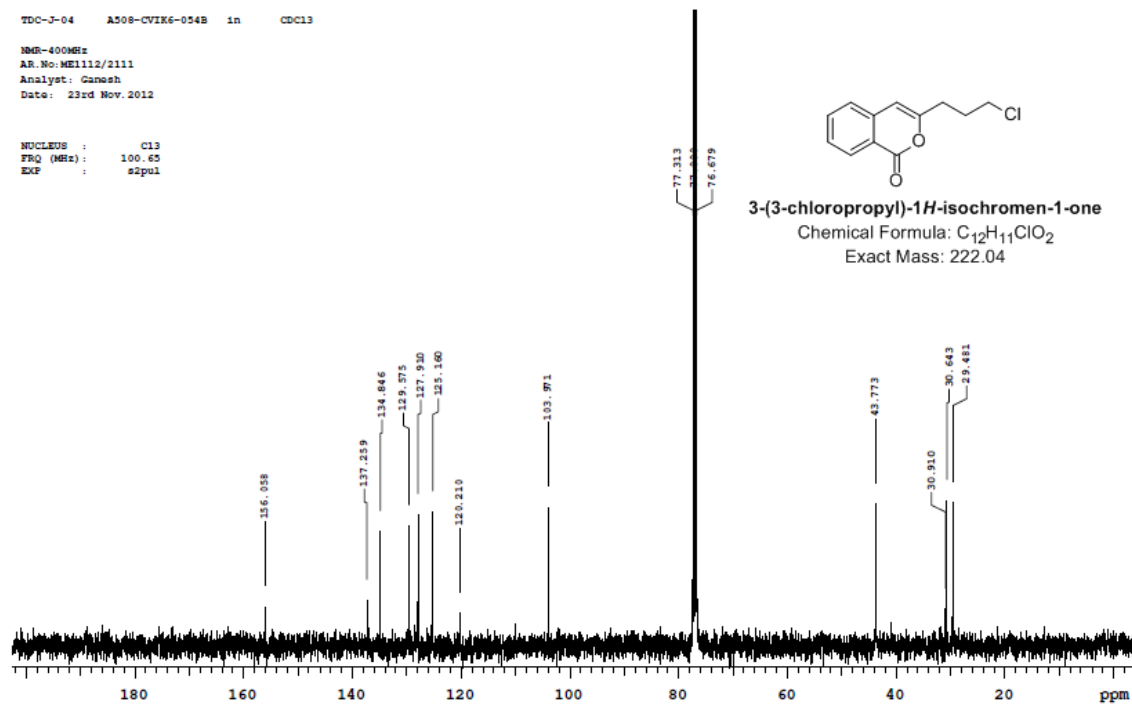

Elemental Composition Report

Single Mass Analysis

Tolerance = 5.0 PPM / DBE: min = -1.5, max = 80.0  
 Element prediction: Off  
 Number of isotope peaks used for i-FIT = 3

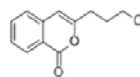

**3-(3-chloropropyl)-1H-isochromen-1-one**  
 Chemical Formula: C<sub>12</sub>H<sub>11</sub>ClO<sub>2</sub>  
 Exact Mass: 222.04

Monoisotopic Mass, Even Electron Ions  
 51 formula(e) evaluated with 1 results within limits (up to 5 best isotopic matches for each mass)  
 Elements Used:  
 C: 0-25 H: 0-25 O: 0-7 Cl: 0-2  
 A508/CV1K5/054 B  
 1: TOF MS ES+

UT1211\_119 21 (0.398) Cm (21:27-58:71x0.010)

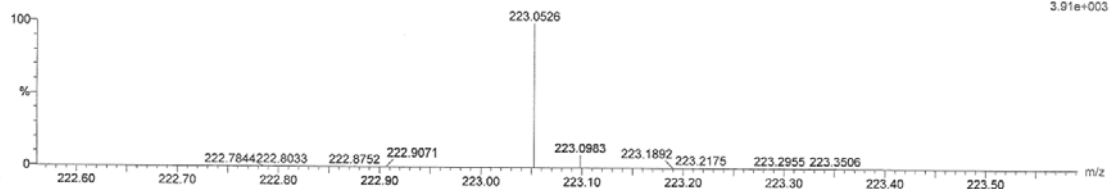

| Mass     | Calc. Mass | mDa | PPM | DBE | i-PIT | Formula       |
|----------|------------|-----|-----|-----|-------|---------------|
| 223.0526 | 223.0526   | 0.0 | 0.0 | 6.5 | n/a   | C12 H12 O2 Cl |

TDC-J-04 A508-CV1K5-059B in CDCl3

NMR-400MHz  
 AR.No: ME1112/1442  
 Analyst: Ganesh  
 Date: 19th Nov. 2012

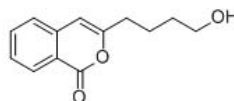

**3-(4-hydroxybutyl)-1H-isochromen-1-one**  
 Chemical Formula: C<sub>13</sub>H<sub>14</sub>O<sub>3</sub>  
 Exact Mass: 218.09

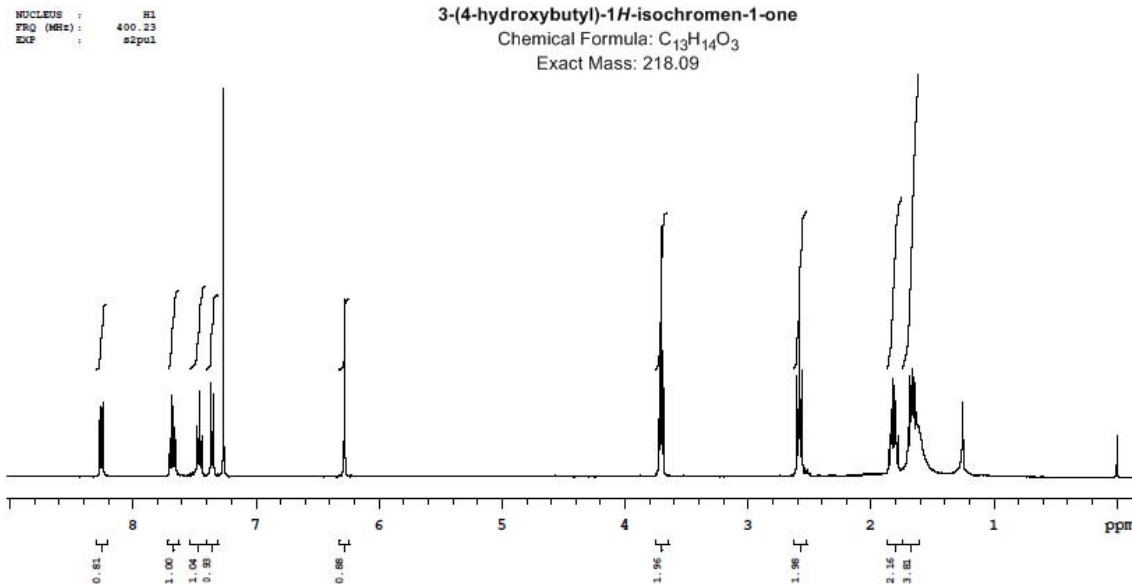

WD-400MHz  
 AR. No: NE1112/2114  
 Analyst: Ganesh  
 Date: 23rd Nov. 2012

NUCLEUS : C13  
 FREQ (MHz): 100.63  
 EXP : s2pul

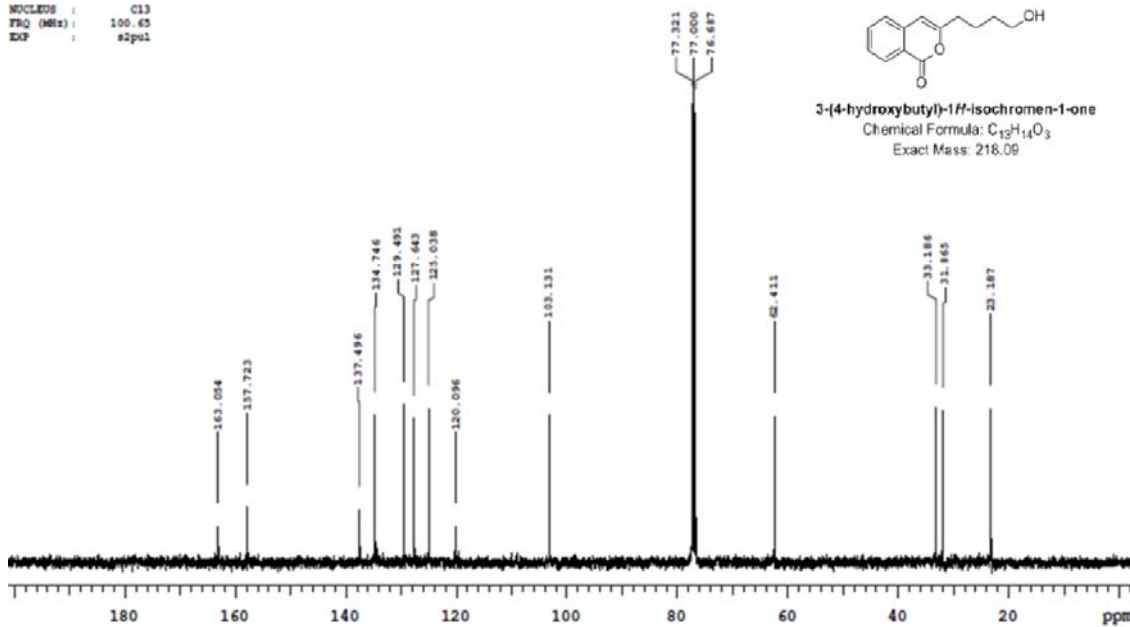

**Elemental Composition Report**

**Single Mass Analysis**

Tolerance = 5.0 PPM / DBE: min = -1.5, max = 80.0

Element prediction: Off

Number of isotope peaks used for i-FIT = 3

Monoisotopic Mass, Even Electron Ions

52 formula(e) evaluated with 1 results within limits (up to 5 best isotopic matches for each mass)

Elements Used:

C: 0-25 H: 0-25 O: 0-7 Cl: 0-2

A508/CV1K8/059 B

1: TOF MS ES+

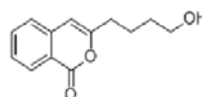

**3-(4-hydroxybutyl)-1H-isochromen-1-one**

Chemical Formula: C<sub>13</sub>H<sub>14</sub>O<sub>3</sub>

Exact Mass: 218.09

UT1211\_120 50 (0.931) Cm (47:53-94:104x0.010)

8.07e+003

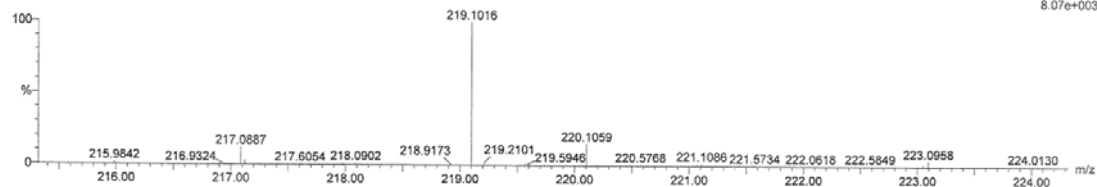

Minimum:

Maximum: 5.0 5.0 -1.5

| Mass     | Calc. Mass | mDa  | PPM  | DBE | i-FIT | Formula    |
|----------|------------|------|------|-----|-------|------------|
| 219.1016 | 219.1021   | -0.5 | -2.3 | 6.5 | 0.4   | C13 H15 O3 |

TDC-J-04 A508-CVIX10-060 in CDCl3

NMR-400MHz  
AR.No:ME1112/1563  
Analyst: Ganesh  
Date: 20th Nov.2012

NUCLEUS : H1  
FREQ (MHz): 400.23  
EXP : s2pul

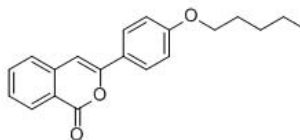

3-(4-(pentyloxy)phenyl)-1H-isochromen-1-one

Chemical Formula: C<sub>20</sub>H<sub>20</sub>O<sub>3</sub>

Exact Mass: 308.14

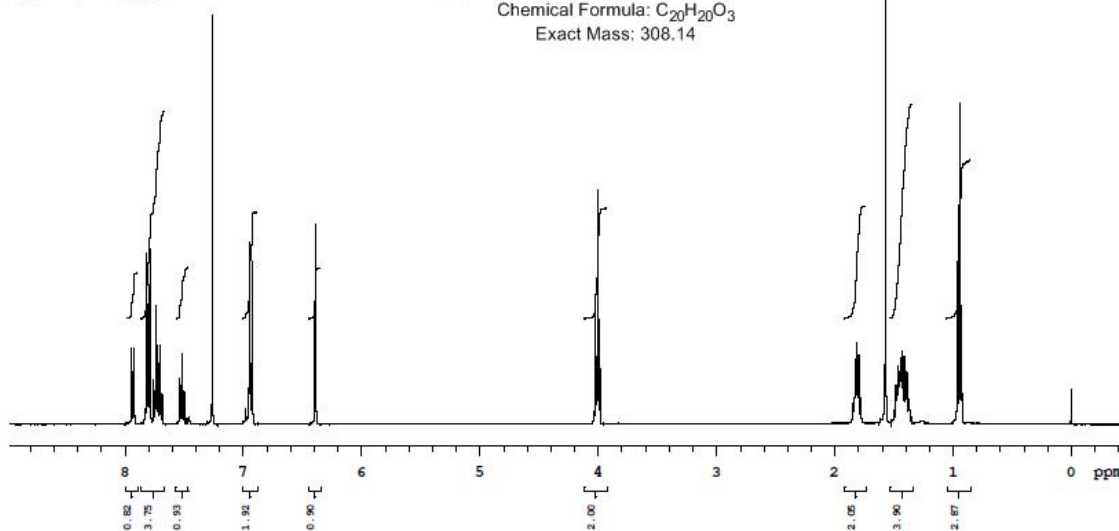

TDC-J-04 A508-CVIX10-060 in CDCl3

NMR-400MHz  
AR.No:ME1112/2112  
Analyst: Ganesh  
Date: 23rd Nov.2012

NUCLEUS : C13  
FREQ (MHz): 100.63  
EXP : s2pul

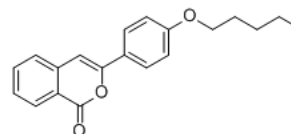

3-(4-(pentyloxy)phenyl)-1H-isochromen-1-one

Chemical Formula: C<sub>20</sub>H<sub>20</sub>O<sub>3</sub>

Exact Mass: 308.14

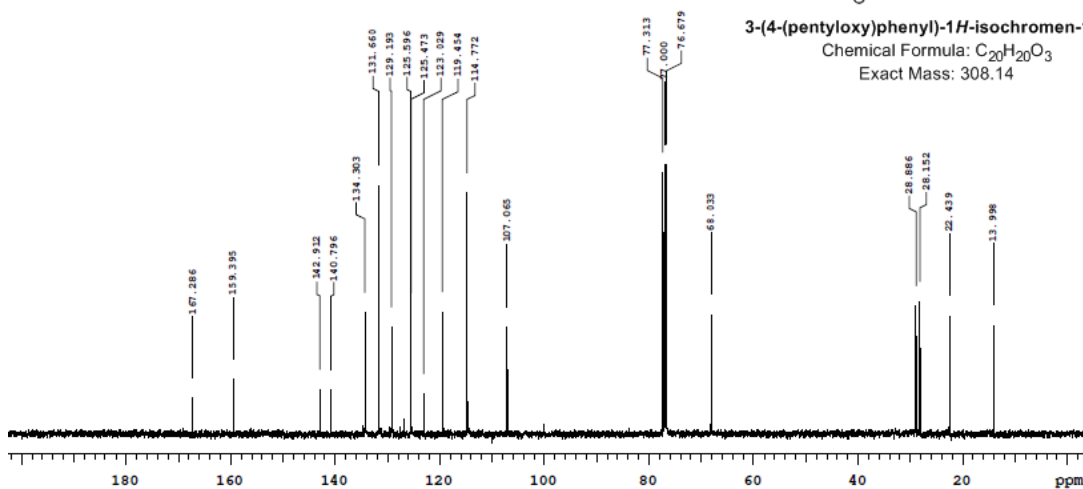



Elemental Composition Report

Page 1

Single Mass Analysis

Tolerance = 5.0 PPM / DBE: min = -1.5, max = 80.0  
 Element prediction: Off  
 Number of isotope peaks used for i-FIT = 3

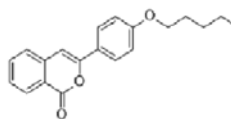

**3-(4-(pentyloxy)phenyl)-1H-isochromen-1-one**  
 Chemical Formula: C<sub>22</sub>H<sub>22</sub>O<sub>3</sub>  
 Exact Mass: 308.14

Monoisotopic Mass, Even Electron Ions  
 18 formula(e) evaluated with 1 results within limits (up to 5 best isotopic matches for each mass)  
 Elements Used:  
 C: 0-25 H: 0-25 O: 0-7  
 A508CVIK101060  
 1: TOF MS ES+

UT1211\_122.21 (0.400) Cm (17:25-68.88x0.010)

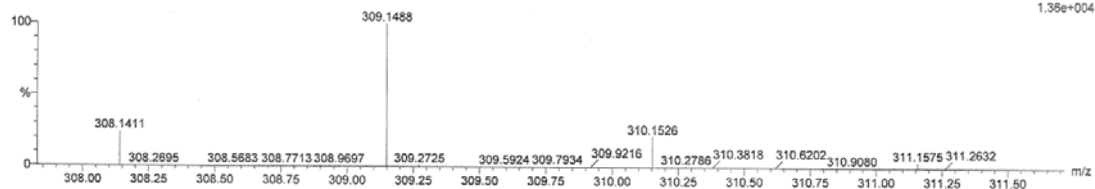

| Mass     | Calc. Mass | mDa  | PPM  | DBE  | i-FIT | Formula    |
|----------|------------|------|------|------|-------|------------|
| 309.1488 | 309.1491   | -0.3 | -1.0 | 10.5 | 15.3  | C20 H21 O3 |

TDC-J-04 A508-CVIX11-055 in cdcl3  
 NMR-400MHz  
 AR.No: ME912/876  
 Analyst: Ganesh  
 Date: 11 th Sep2012

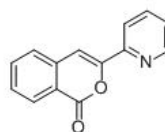

**3-(pyridin-2-yl)-1H-isochromen-1-one**  
 Chemical Formula: C<sub>14</sub>H<sub>9</sub>NO<sub>2</sub>  
 Exact Mass: 223.06

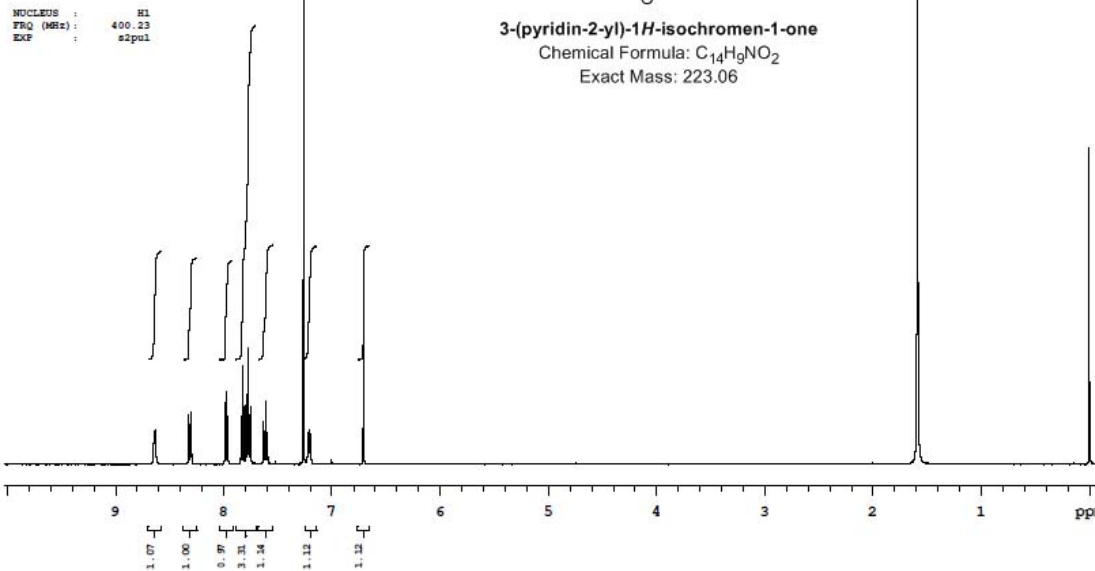

TDCJ-04 A508/CVIK11/055 in CDCl3

NAME: 400MHz  
 AR. No: ME0912/1405  
 Analyst: Haribabu  
 Date: 14 th Sep 2012

NUCLEUS : C13  
 FREQ (MHz): 100.62  
 EXP : zgpg1

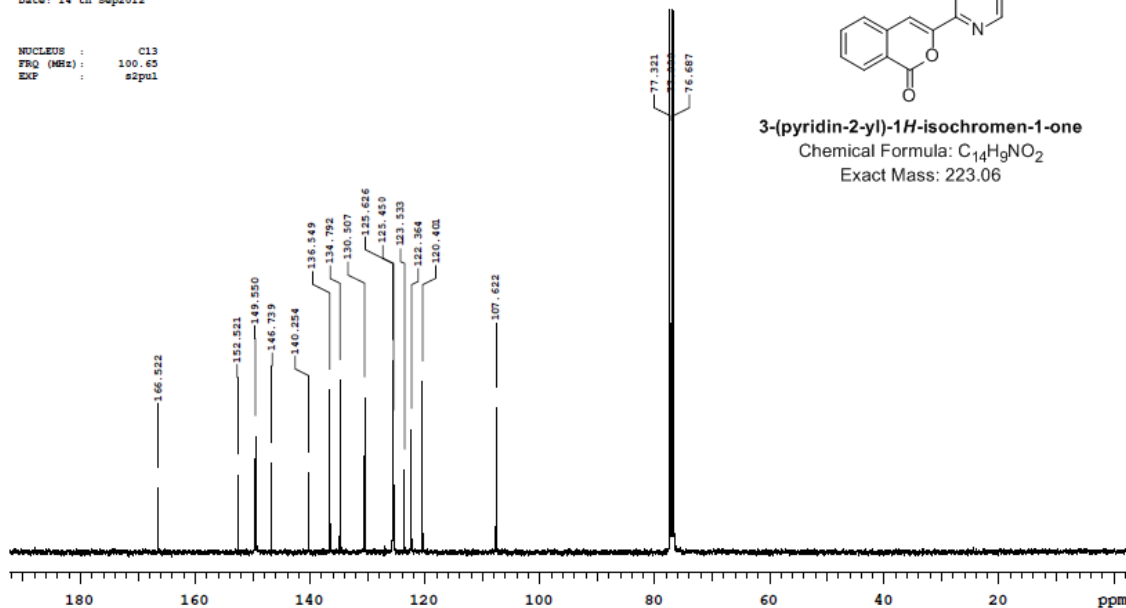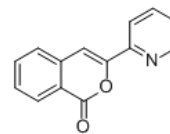

**3-(pyridin-2-yl)-1H-isochromen-1-one**  
 Chemical Formula: C<sub>14</sub>H<sub>9</sub>NO<sub>2</sub>  
 Exact Mass: 223.06

Elemental Composition Report

Page 1

Single Mass Analysis

Tolerance = 5.0 PPM / DBE: min = -1.5, max = 80.0  
 Element prediction: Off  
 Number of isotope peaks used for i-FIT = 3

Monoisotopic Mass, Even Electron Ions  
 15 formula(e) evaluated with 1 results within limits (up to 4 best isotopic matches for each mass)  
 Elements Used:  
 C: 0-19 H: 0-10 N: 0-4 O: 0-2  
 A508-VIKKY1-055  
 UT1211\_075 26 (0.486) Cm (26.28-73.79x0.010)

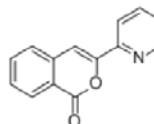

**3-(pyridin-2-yl)-1H-isochromen-1-one**  
 Chemical Formula: C<sub>14</sub>H<sub>9</sub>NO<sub>2</sub>  
 Exact Mass: 223.06

1: TOF MS ES+  
 9.93e+003

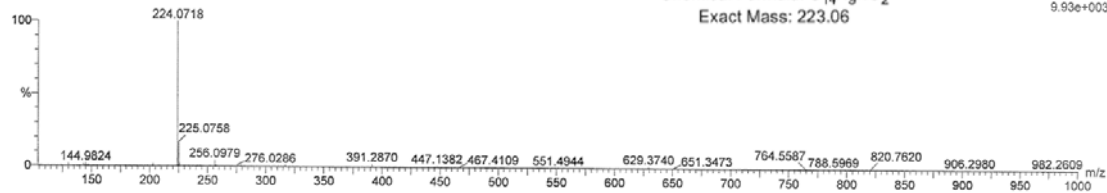

| Mass     | Calc. Mass | mDa | PPM | DBE  | i-FIT | Formula      |
|----------|------------|-----|-----|------|-------|--------------|
| 224.0718 | 224.0712   | 0.6 | 2.7 | 10.5 | 0.7   | C14 H10 N O2 |

TDCJ-04 A508-CVIK12-056 in CDCl3

NMR-400MHz  
AR.No:ME0912/875  
Analyst: Ganesh  
Date: 11 th Sep2012

NUCLEUS : H1  
FRQ (MHz): 400.23  
EXP : s2pul

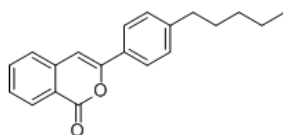

**3-(4-pentylphenyl)-1H-isochromen-1-one**

Chemical Formula: C<sub>20</sub>H<sub>20</sub>O<sub>2</sub>

Exact Mass: 292.15

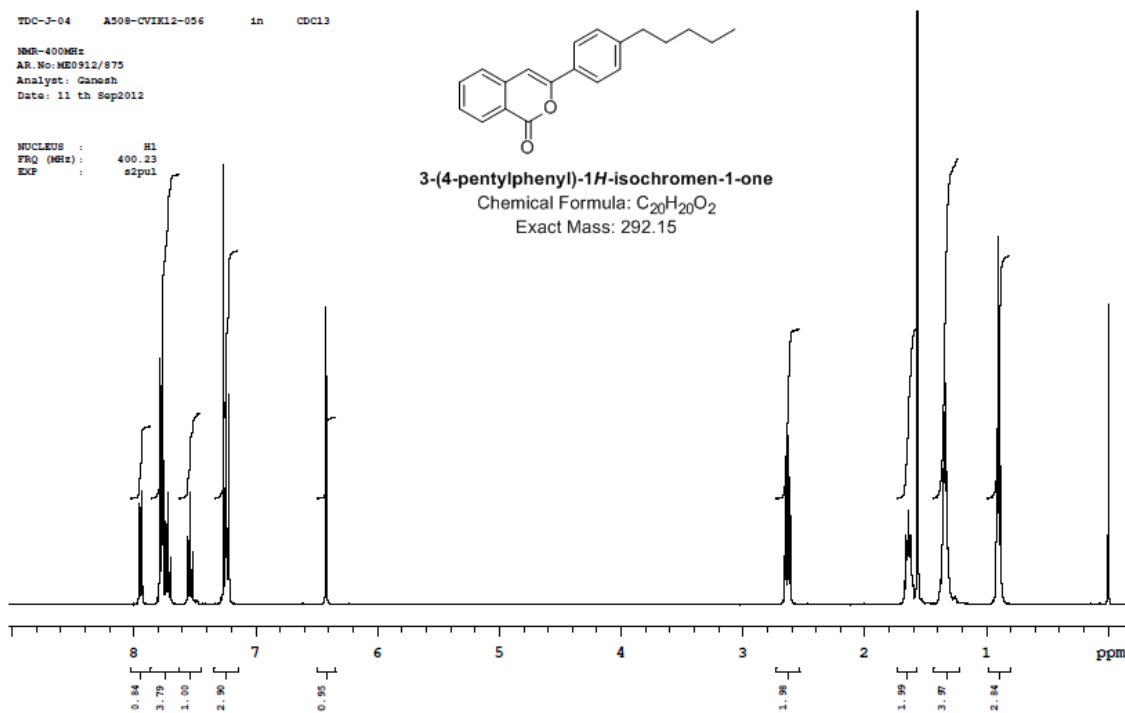

TDCJ-04 A508-CVIK12/056 in CDCl3

NMR-400MHz  
AR.No:ME0912/1404  
Analyst: Haribabu  
Date: 14 th Sep2012

NUCLEUS : C13  
FRQ (MHz): 100.63  
EXP : s2pul

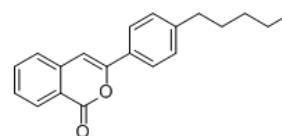

**3-(4-pentylphenyl)-1H-isochromen-1-one**

Chemical Formula: C<sub>20</sub>H<sub>20</sub>O<sub>2</sub>

Exact Mass: 292.15

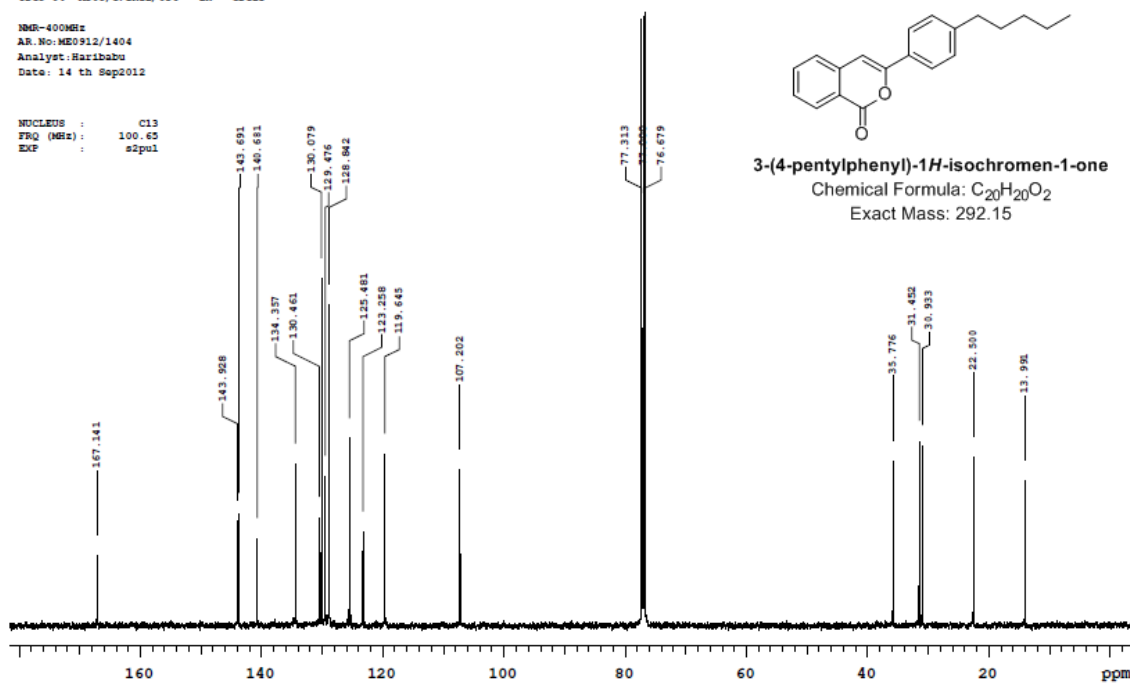

Elemental Composition Report

Page 1

Single Mass Analysis

Tolerance = 5.0 PPM / DBE: min = -1.5, max = 80.0  
 Element prediction: Off  
 Number of isotope peaks used for i-FIT = 3

Monoisotopic Mass, Even Electron Ions  
 3 formula(e) evaluated with 1 results within limits (up to 4 best isotopic matches for each mass)  
 Elements Used:  
 C: 0-22 H: 0-22 O: 0-2  
 A508-VIKKY1-056  
 UT1211\_076 17 (0.325) Cm (17:20-65:72x0.010)

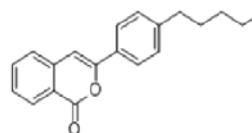

3-(4-pentylphenyl)-1H-isochromen-1-one

Chemical Formula: C<sub>20</sub>H<sub>20</sub>O<sub>2</sub>  
 Exact Mass: 292.15

1: TOF MS ES+  
 5.78e+003

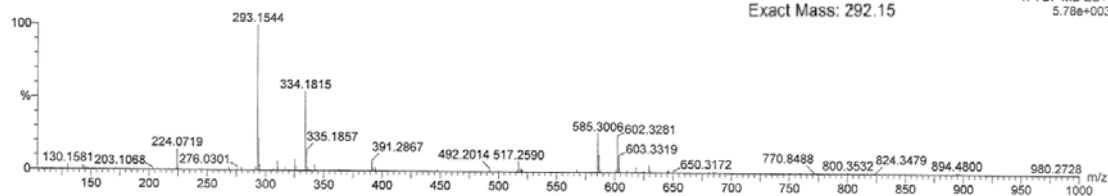

| Mass     | Calc. Mass | mDa | PPM | DBE  | i-PIT | Formula                                        |
|----------|------------|-----|-----|------|-------|------------------------------------------------|
| 293.1544 | 293.1542   | 0.2 | 0.7 | 10.5 | 4.3   | C <sub>20</sub> H <sub>21</sub> O <sub>2</sub> |

TDC-J-04 A508-CVIXL3-057 in CDCl<sub>3</sub>  
 NMR-400MHz  
 AR. No: ME0812/874  
 Analyst: Ganesh  
 Date: 11 th Sep2012

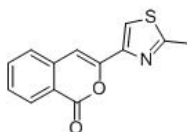

3-(2-methylthiazol-4-yl)-1H-isochromen-1-one

Chemical Formula: C<sub>13</sub>H<sub>9</sub>NO<sub>2</sub>S  
 Exact Mass: 243.04

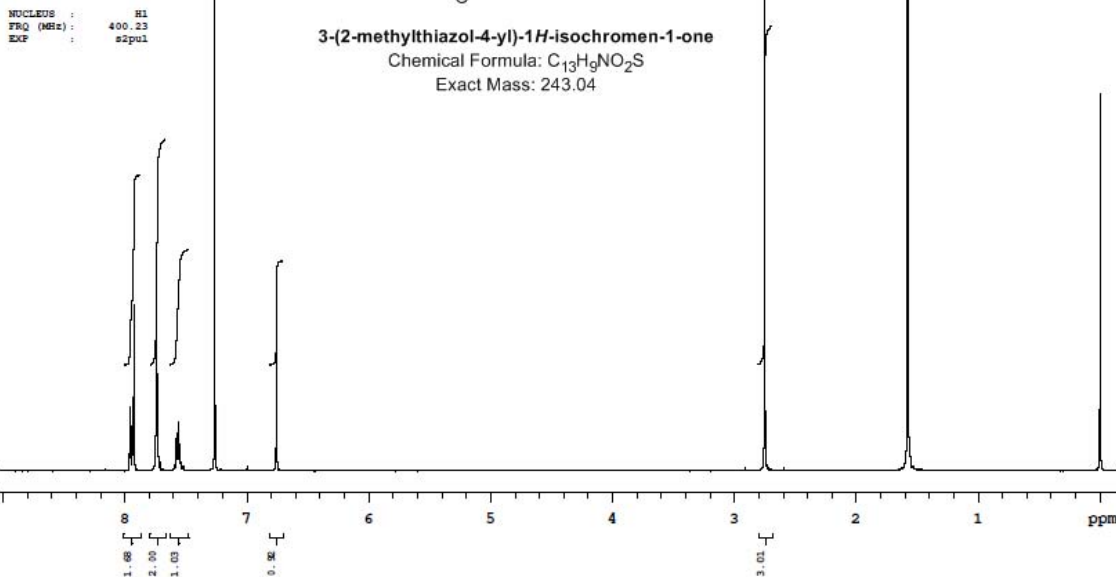

TDCJ-04 A508/CV1K13/057 in CDCl3  
 INM-400MS  
 AR. No: ME0912/1403  
 Analyst: Haribabu  
 Date: 14 th Sep2012

NUCLEUS : C13  
 FREQ (MHz) : 100.63  
 EXP : s2pul

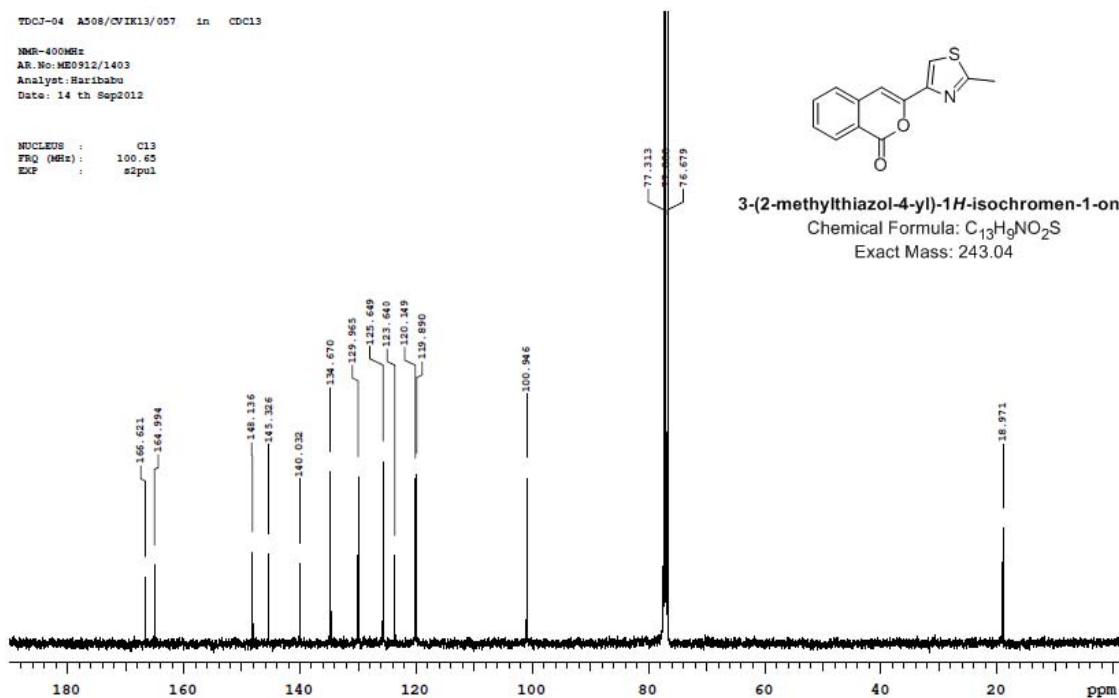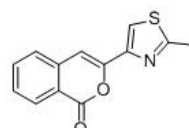

**3-(2-methylthiazol-4-yl)-1H-isochromen-1-one**  
 Chemical Formula: C<sub>13</sub>H<sub>9</sub>NO<sub>2</sub>S  
 Exact Mass: 243.04

**Elemental Composition Report**

**Single Mass Analysis**

Tolerance = 100.0 PPM / DBE: min = -1.5, max = 80.0  
 Element prediction: Off  
 Number of isotope peaks used for i-FIT = 3

**Monoisotopic Mass, Even Electron Ions**

13 formula(e) evaluated with 1 results within limits (up to 4 best isotopic matches for each mass)

**Elements Used:**

C: 0-15 H: 0-15 N: 0-2 O: 0-2 S: 0-1

A508-VIKKY1-057

UT1211\_077 31 (0.573) Cm (30.32-62.68x0.010)

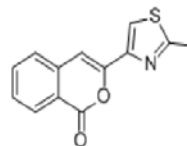

**3-(2-methylthiazol-4-yl)-1H-isochromen-1-one**

Chemical Formula: C<sub>13</sub>H<sub>9</sub>NO<sub>2</sub>S  
 Exact Mass: 243.04

Page 1

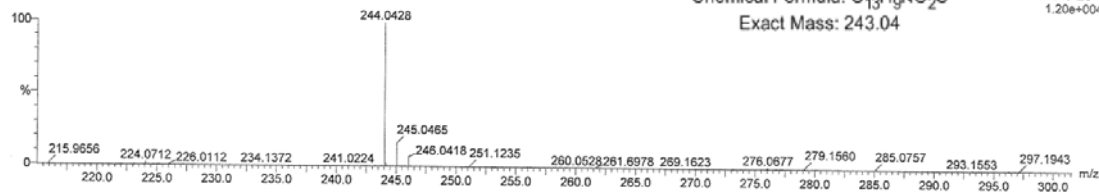

Minimum:

Maximum:

| Mass     | Calc. Mass | mDa  | PPM  | DBE | i-FIT | Formula        |
|----------|------------|------|------|-----|-------|----------------|
| 244.0428 | 244.0432   | -0.4 | -1.6 | 9.5 | 1.3   | C13 H10 N O2 S |

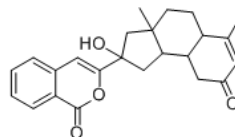

3-(2-hydroxy-3a,6-dimethyl-8-oxo-2,3,3a,4,5,5a,8,9,9a,9b-decahydro-1H-cyclopenta[a]naphthalen-2-yl)-1H-isochromen-1-one

Chemical Formula: C<sub>24</sub>H<sub>26</sub>O<sub>4</sub>  
Exact Mass: 378.18

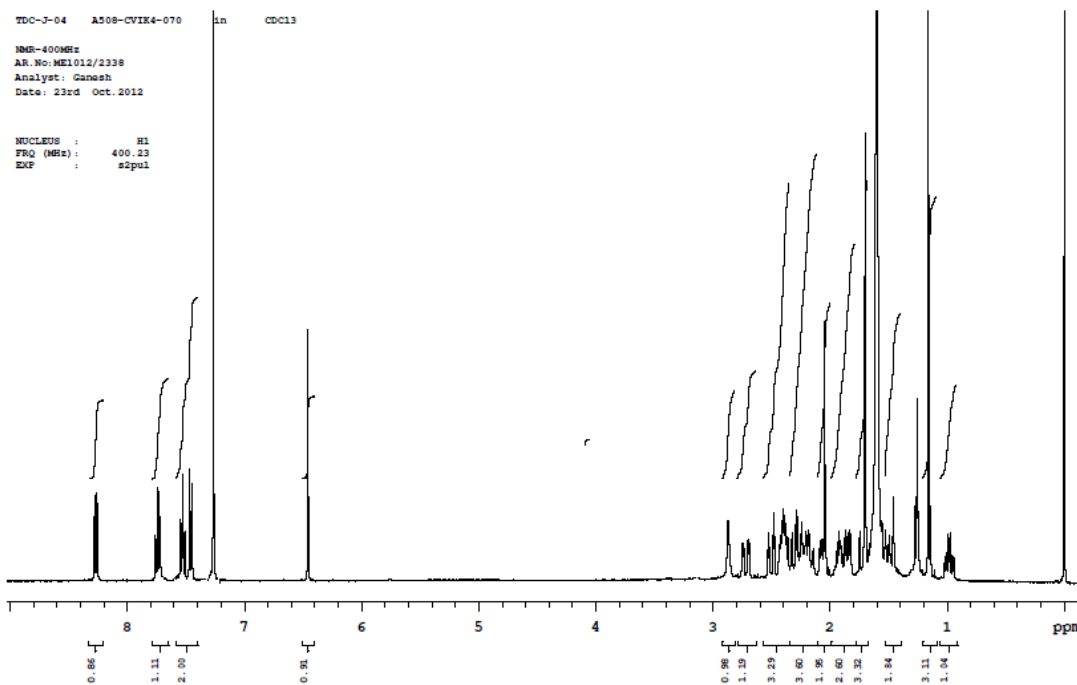

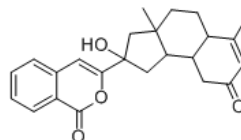

**3-(2-hydroxy-3a,6-dimethyl-8-oxo-2,3,3a,4,5,5a,8,9,9a,9b-decahydro-1H-cyclopenta[a]naphthalen-2-yl)-1H-isochromen-1-one**

Chemical Formula: C<sub>24</sub>H<sub>26</sub>O<sub>4</sub>  
 Exact Mass: 378.18

TDC-J-04 A508-CV1K14-070 in CDC13

MR: 400MHz  
 AR.No: ME1112/564  
 Analyst: Haribabu  
 Date: 07th Nov. 2012

NUCLEUS : C13  
 FREQ (MHz): 100.65  
 EXP : s2pul

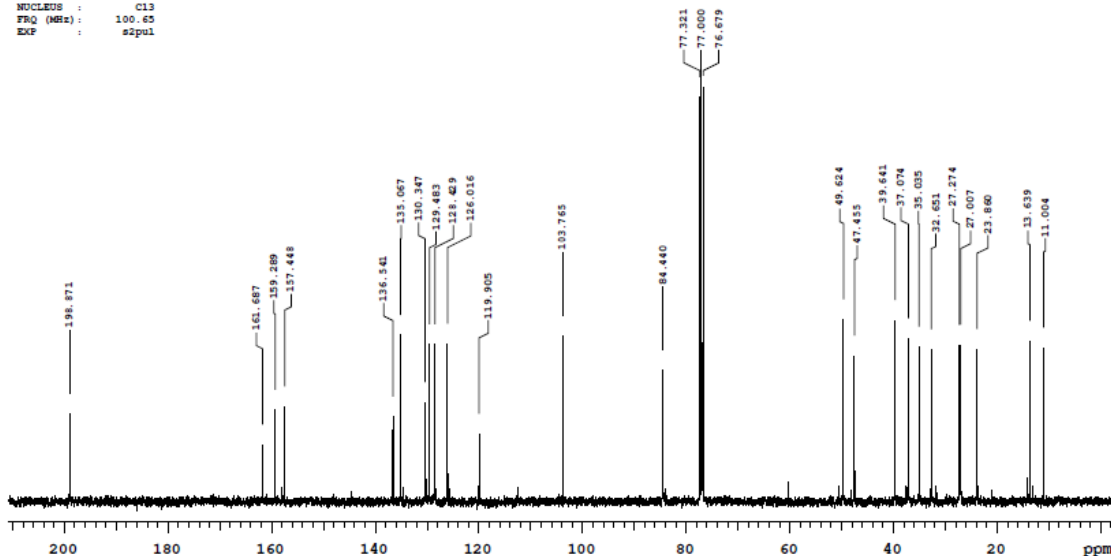

**Elemental Composition Report**

**Single Mass Analysis**

Tolerance = 5.0 PPM / DBE: min = -1.5, max = 80.0  
 Element prediction: Off  
 Number of isotope peaks used for I-FIT = 2

Monoisotopic Mass, Even Electron Ions  
 12 formula(e) evaluated with 1 results within limits (up to 5 closest results for each mass)  
 Elements Used:  
 C: 0-30 H: 0-30 O: 0-4  
 A508/CV1K14/070B  
 1302110:3 30 (0.561) Cm (29:32)

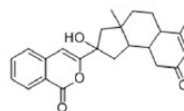

**3-(2-hydroxy-3a,6-dimethyl-8-oxo-2,3,3a,4,5,5a,8,9,9a,9b-decahydro-1H-cyclopenta[a]naphthalen-2-yl)-1H-isochromen-1-one**

Chemical Formula: C<sub>24</sub>H<sub>26</sub>O<sub>4</sub>  
 Exact Mass: 378.18

Page 1

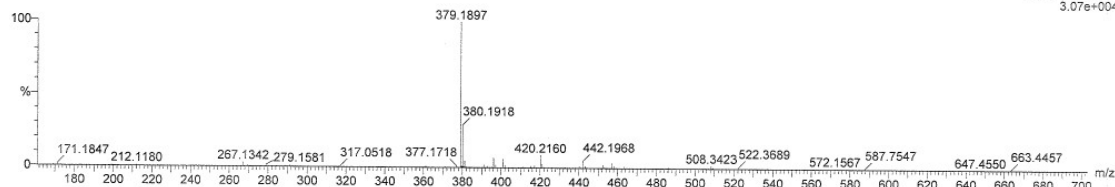

| Mass     | Calc. Mass | mDa  | PPM  | DBE  | i-FIT | Formula                                        |
|----------|------------|------|------|------|-------|------------------------------------------------|
| 379.1897 | 379.1909   | -1.2 | -3.2 | 11.5 | 15.3  | C <sub>24</sub> H <sub>27</sub> O <sub>4</sub> |

Gajanan  
 1: TOF MS ES+  
 3.07e+004

TDC-J-04 A508-CVIK20-074 in CDCl3

NMR-400MHz  
AR.No:ME1112/202  
Analyst: Ganesh  
Date:05th Nov.2012

NUCLEUS : H1  
FRQ (MHz): 400.23  
EXP : s2pul

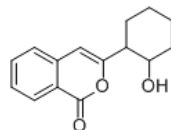

3-(2-hydroxycyclohexyl)-1*H*-isochromen-1-one

Chemical Formula: C<sub>15</sub>H<sub>16</sub>O<sub>3</sub>

Exact Mass: 244.11

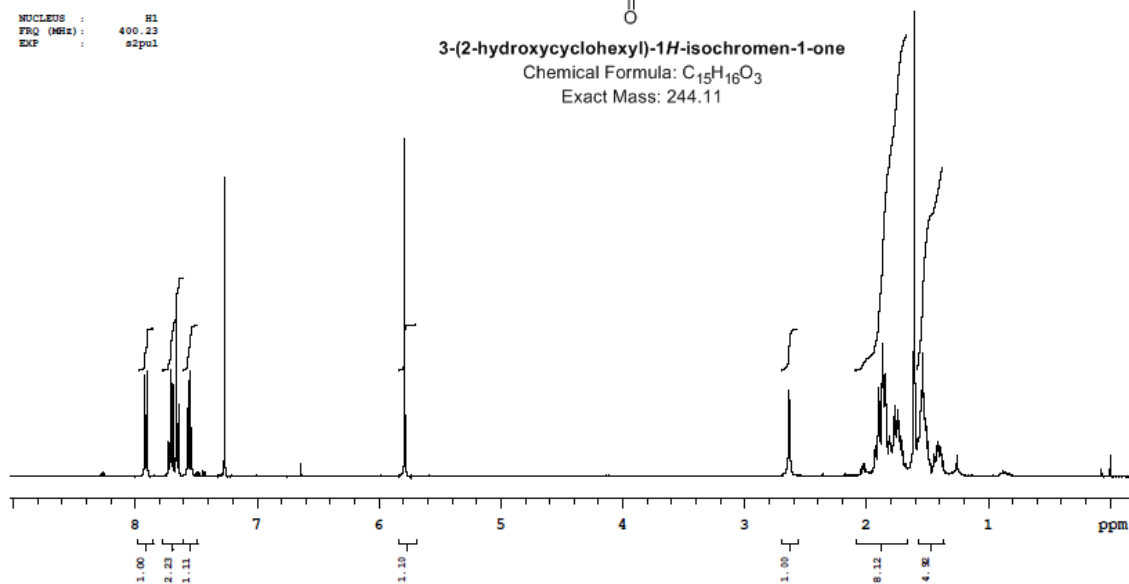

TDC-J-04 A508-CVIK20-074 in CDCl3

NMR-400MHz  
AR.No:ME1112/870  
Analyst: Haribabu  
Date:09th Nov.2012

NUCLEUS : C13  
FRQ (MHz): 100.63  
EXP : s2pul

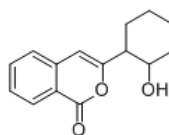

3-(2-hydroxycyclohexyl)-1*H*-isochromen-1-one

Chemical Formula: C<sub>15</sub>H<sub>16</sub>O<sub>3</sub>

Exact Mass: 244.11

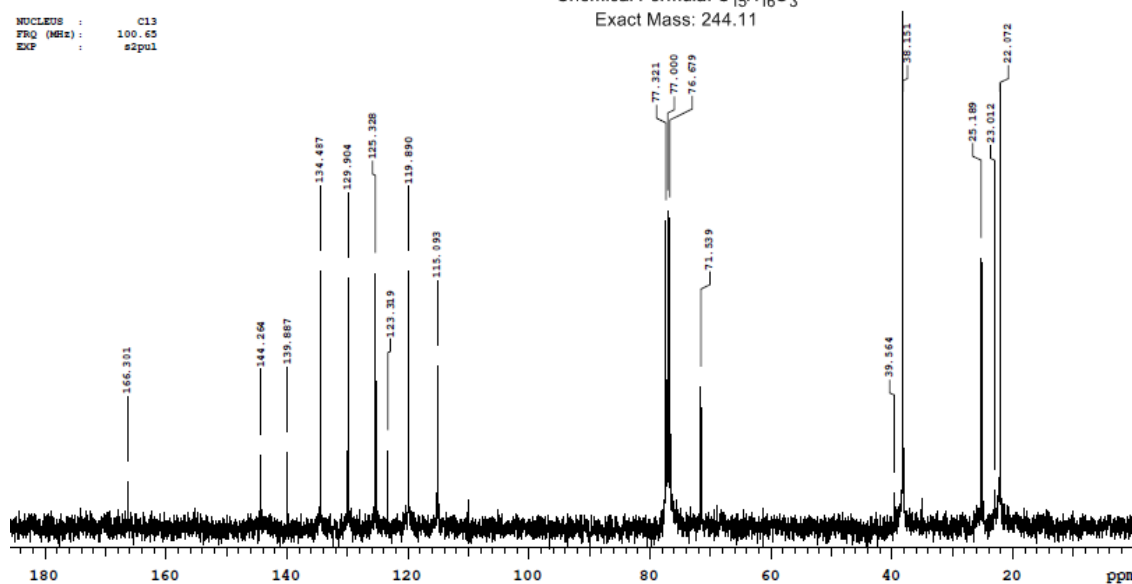



Elemental Composition Report

Page 1

Single Mass Analysis

Tolerance = 5.0 PPM / DBE: min = -1.5, max = 80.0  
 Element prediction: Off  
 Number of isotope peaks used for i-FIT = 3

Monoisotopic Mass, Even Electron Ions  
 9 formula(e) evaluated with 1 results within limits (up to 8 best isotopic matches for each mass)  
 Elements Used:  
 C: 0-20 H: 0-20 O: 0-4  
 A508/CV1K20/074A  
 130103004 13 (0.365) Cm (13.18)

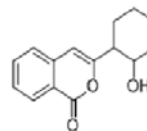

3-(2-hydroxycyclohexyl)-1H-isochromen-1-one

Chemical Formula: C<sub>15</sub>H<sub>16</sub>O<sub>3</sub>  
 Exact Mass: 244.11

Gajanan  
 1: TOF MS ES+  
 3.56e+004

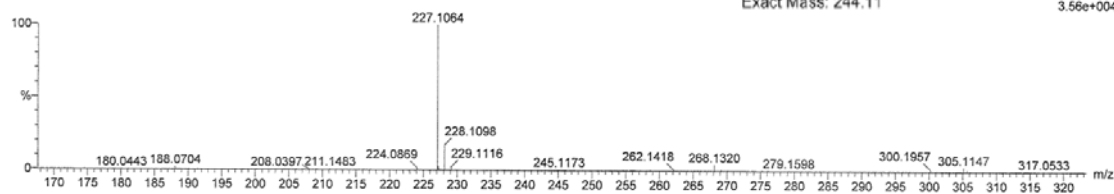

| Mass     | Calc. Mass | mDa  | PPM  | DBE | i-FIT | Formula    |
|----------|------------|------|------|-----|-------|------------|
| 245.1173 | 245.1178   | -0.5 | -2.0 | 7.5 | 1.2   | C15 H17 O3 |

TDC-J-04 A508-CV1K21-075 in CDCl3

100-400MHz  
 AR. No: ME1112/618  
 Analyst: Ganesh  
 Date: 08th Nov. 2012

NUCLEUS : H1  
 FRQ (MHz): 400.23  
 EXP : s2pul

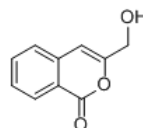

3-(hydroxymethyl)-1H-isochromen-1-one

Chemical Formula: C<sub>10</sub>H<sub>8</sub>O<sub>3</sub>  
 Exact Mass: 176.05

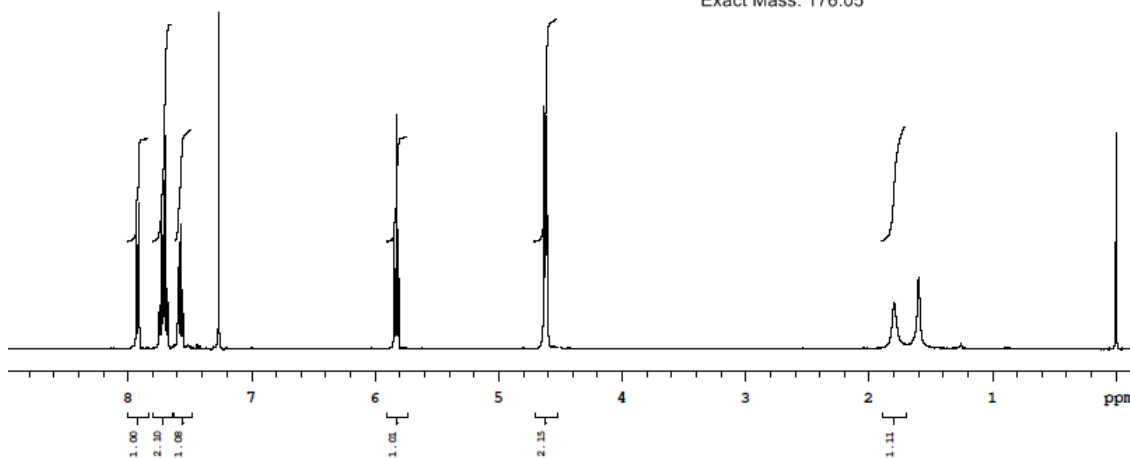

NMR-400MHz  
 LR No: ME1112/964  
 Analyst: Haribabu  
 Date: 12th Nov. 2012

NUCLEUS : C13  
 FREQ (MHz): 100.63  
 EXP : zgpg30

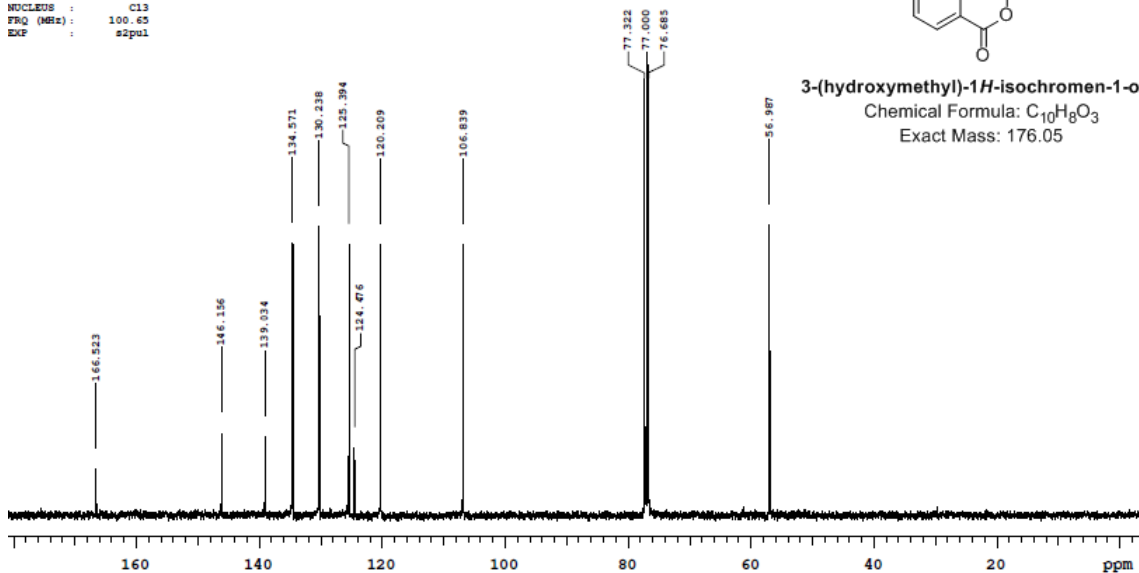

Elemental Composition Report

Page 1

Single Mass Analysis

Tolerance = 5.0 PPM / DBE: min = -1.5, max = 80.0  
 Element prediction: Off  
 Number of isotope peaks used for i-FIT = 3

Monoisotopic Mass, Even Electron Ions  
 8 formula(e) evaluated with 1 results within limits (up to 8 best isotopic matches for each mass)  
 Elements Used:  
 C: 0-20 H: 0-20 O: 0-4  
 A508/CVIK21/075A  
 130103005 10 (0.278) Cm (8.12)

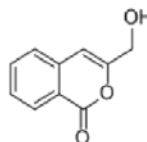

3-(hydroxymethyl)-1H-isochromen-1-one  
 Chemical Formula: C<sub>10</sub>H<sub>8</sub>O<sub>3</sub>  
 Exact Mass: 176.05

Gajanan  
 1: TOF MS ES+  
 3.01e+003

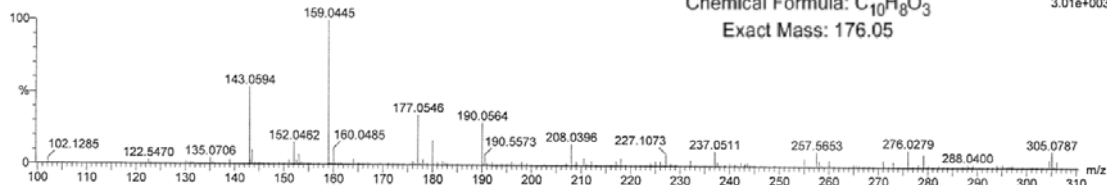

| Mass     | Calc. Mass | mDa  | PPM  | DBE | i-FIT | Formula   |
|----------|------------|------|------|-----|-------|-----------|
| 177.0546 | 177.0552   | -0.6 | -3.4 | 6.5 | 5.8   | C10 H9 O3 |

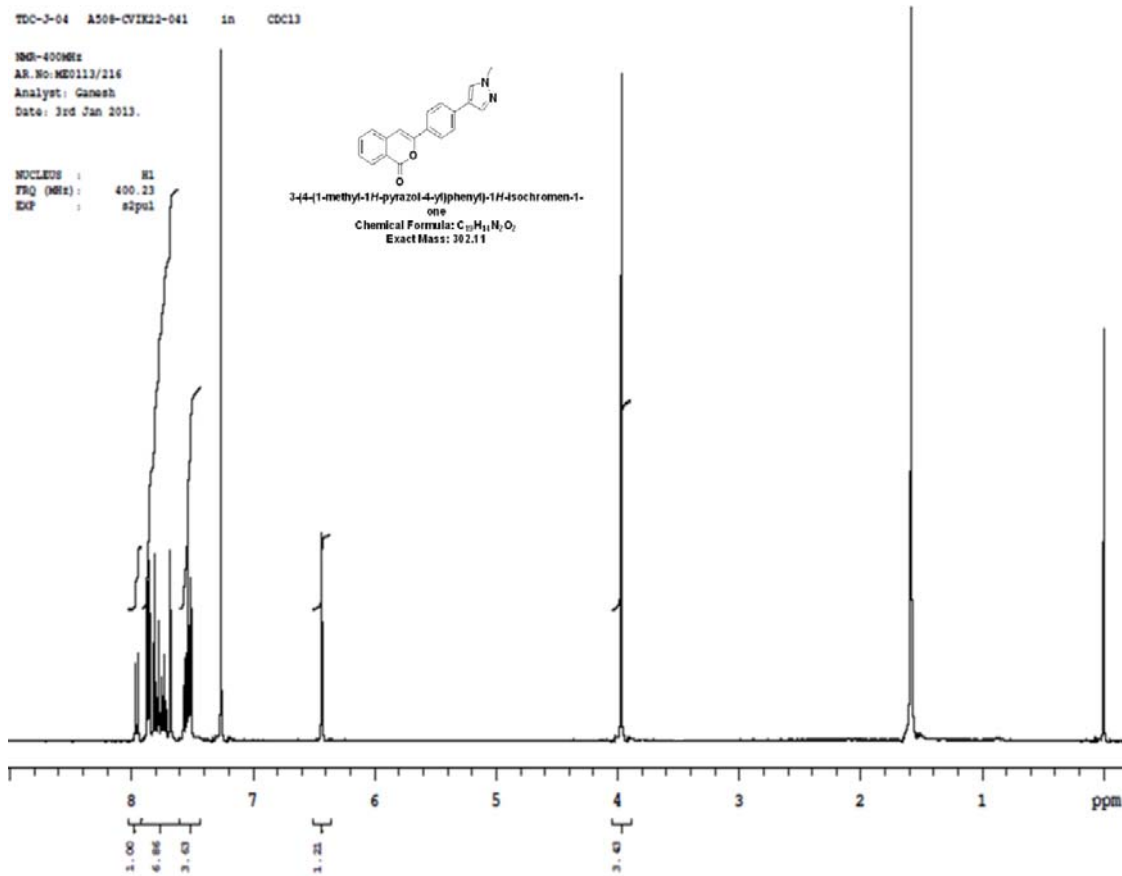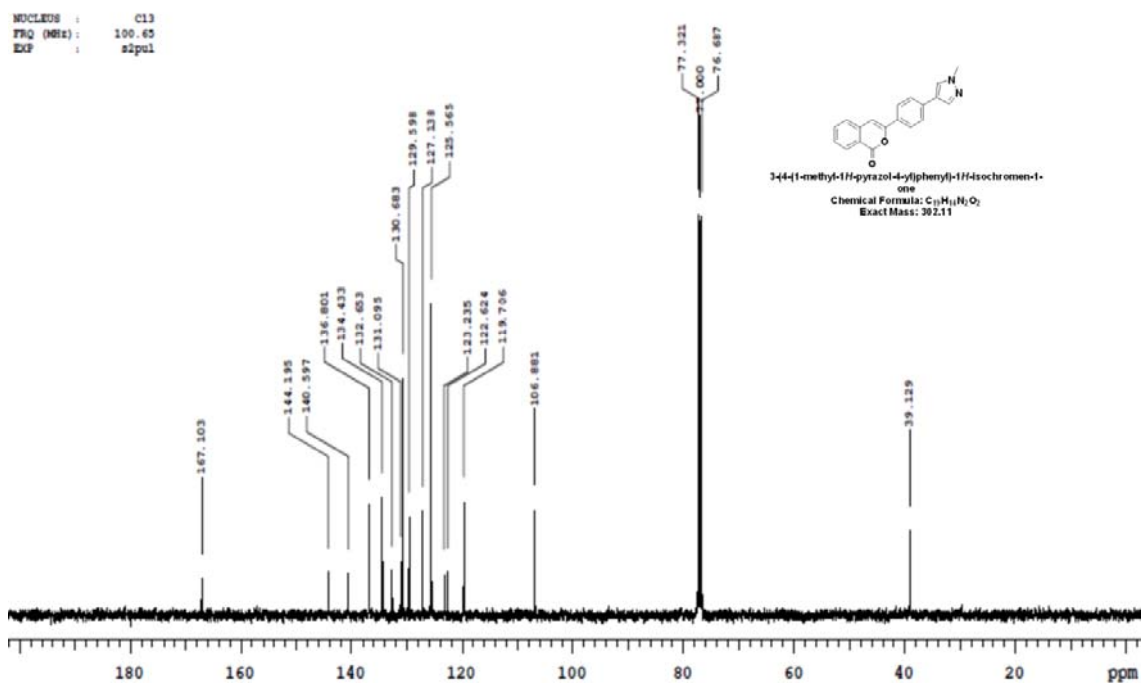

Elemental Composition Report

Page 1

Single Mass Analysis

Tolerance = 5.0 PPM // DBE: min = -1.5, max = 80.0  
 Element prediction: Off  
 Number of isotope peaks used for i-FIT = 3

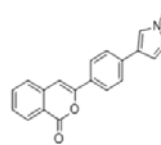

3-(4-(1-methyl-1H-pyrazol-4-yl)phenyl)-1H-isochromen-1-one  
 Chemical Formula: C<sub>19</sub>H<sub>15</sub>N<sub>2</sub>O<sub>2</sub>  
 Exact Mass: 302.11

Monoisotopic Mass, Even Electron Ions  
 5 formula(e) evaluated with 1 results within limits (up to 8 best isotopic matches for each mass)  
 Elements Used:  
 C: 0-20 H: 0-20 N: 0-2 O: 0-2  
 A508/CV1K22/041  
 1: TOF MS ES+

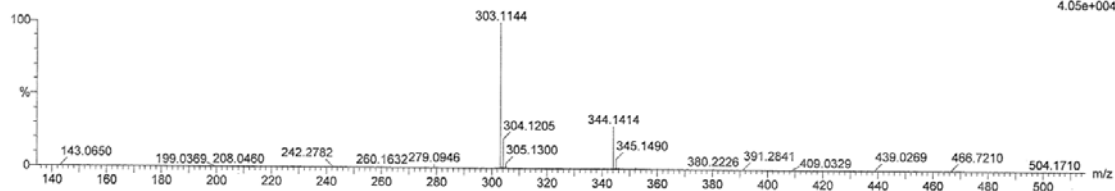

| Mass     | Calc. Mass | mDa | PPM | DBE  | i-FIT | Formula                                                       |
|----------|------------|-----|-----|------|-------|---------------------------------------------------------------|
| 303.1144 | 303.1134   | 1.0 | 3.3 | 13.5 | 68.8  | C <sub>19</sub> H <sub>15</sub> N <sub>2</sub> O <sub>2</sub> |

TDC-J-04 A508-CV1K23-042 in CDCl<sub>3</sub>

NMR-400MHz  
 AR.No:ME0113/291  
 Analyst: Ganesh  
 Date: 3rd Jan 2013.

NUCLEUS : H1  
 FREQ (MHz): 400.23  
 EXP : s2pul

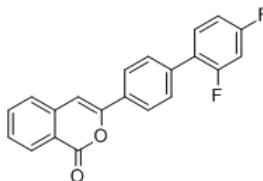

3-(2',4'-difluoro-[1,1'-biphenyl]-4-yl)-1H-isochromen-1-one  
 Chemical Formula: C<sub>21</sub>H<sub>12</sub>F<sub>2</sub>O<sub>2</sub>  
 Exact Mass: 334.08

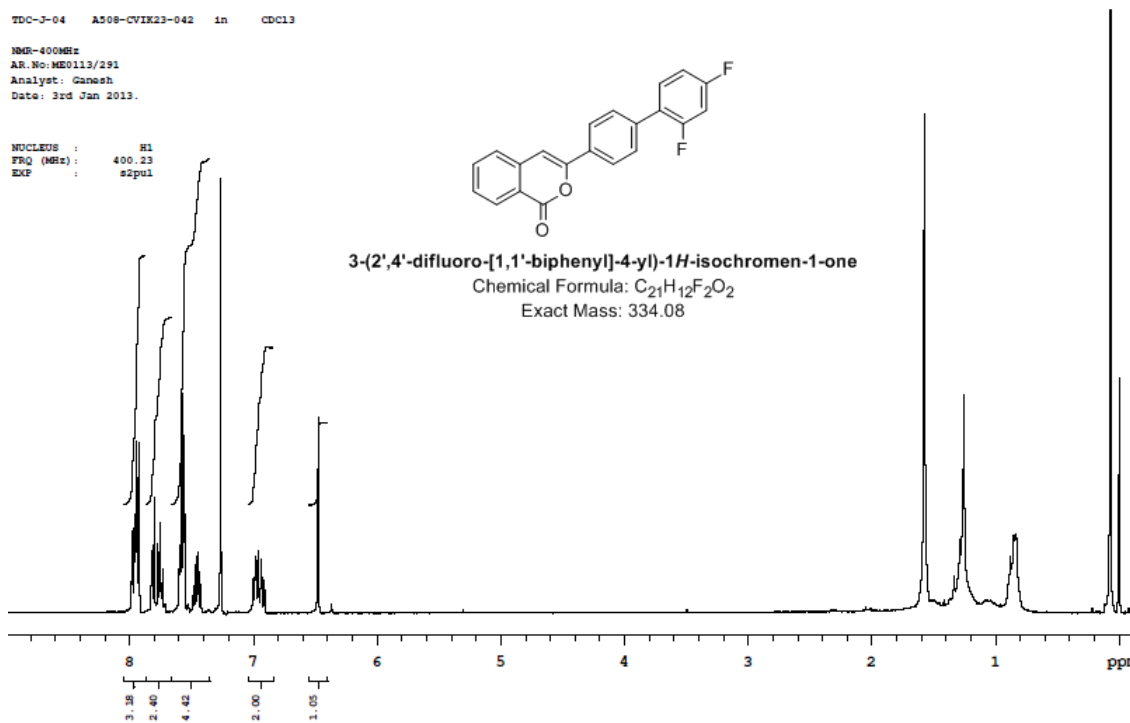

MSD-400MHz  
 LR. No: MS0113/461  
 Analyst: Ganesh  
 Date: 4th Jan 2013.

NUCLEUS : C13  
 FREQ (MHz): 100.63  
 EXP : sfpul

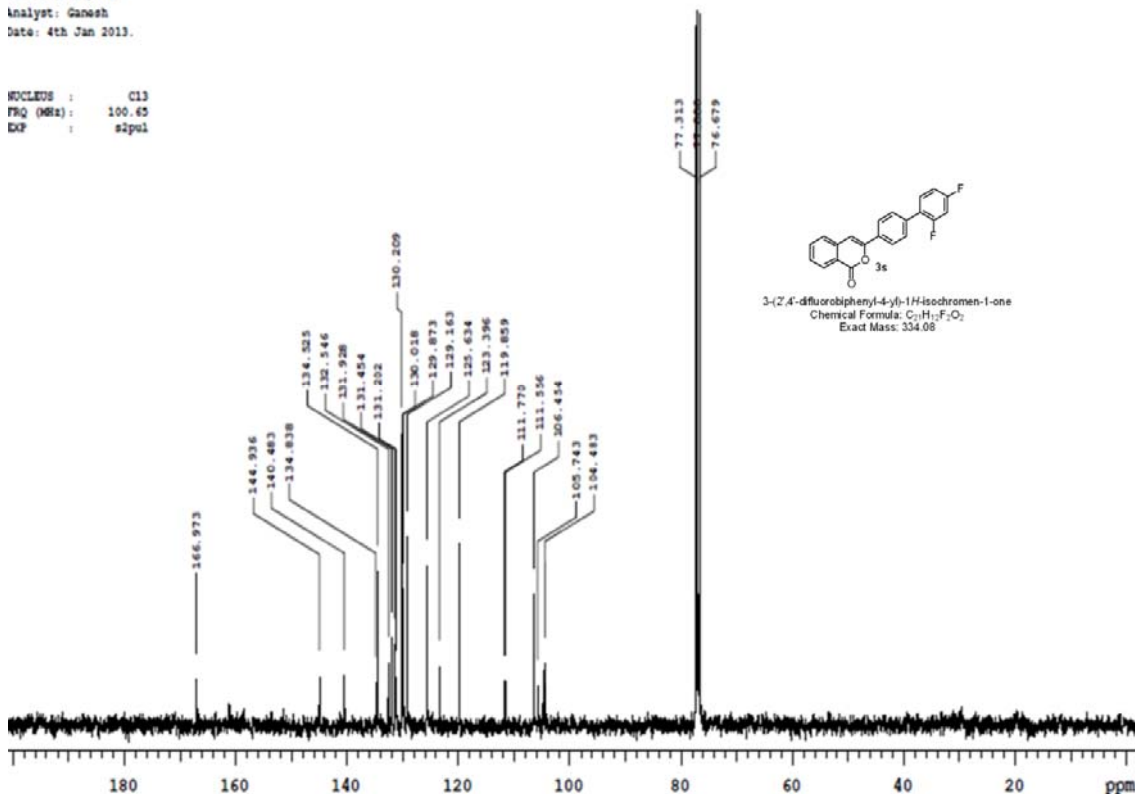

Elemental Composition Report

Single Mass Analysis

Tolerance = 5.0 PPM / DBE: min = -1.5, max = 80.0  
 Element prediction: Off  
 Number of isotope peaks used for i-FIT = 3

Monoisotopic Mass, Even Electron Ions  
 7 formula(e) evaluated with 1 results within limits (up to 8 best isotopic matches for each mass)  
 Elements Used:  
 C: 0-22 H: 0-30 O: 0-2 F: 0-2  
 A508/CV/K23/042  
 1: TOF MS ES+

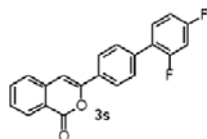

3-(2,4-difluorophenyl-4-yl)-1H-isochromen-1-one  
 Chemical Formula: C<sub>21</sub>H<sub>13</sub>F<sub>2</sub>O<sub>2</sub>  
 Exact Mass: 334.08

Page 1

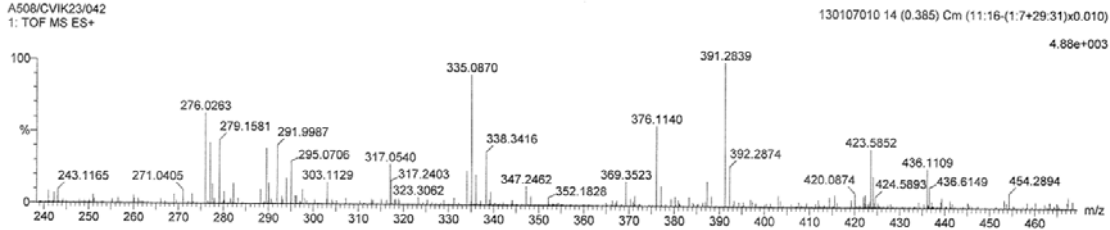

| Mass     | Calc. Mass | mDa  | PPM  | DBE  | i-FIT | Formula       |
|----------|------------|------|------|------|-------|---------------|
| 335.0870 | 335.0884   | -1.4 | -4.2 | 14.5 | 1.0   | C21 H13 O2 F2 |

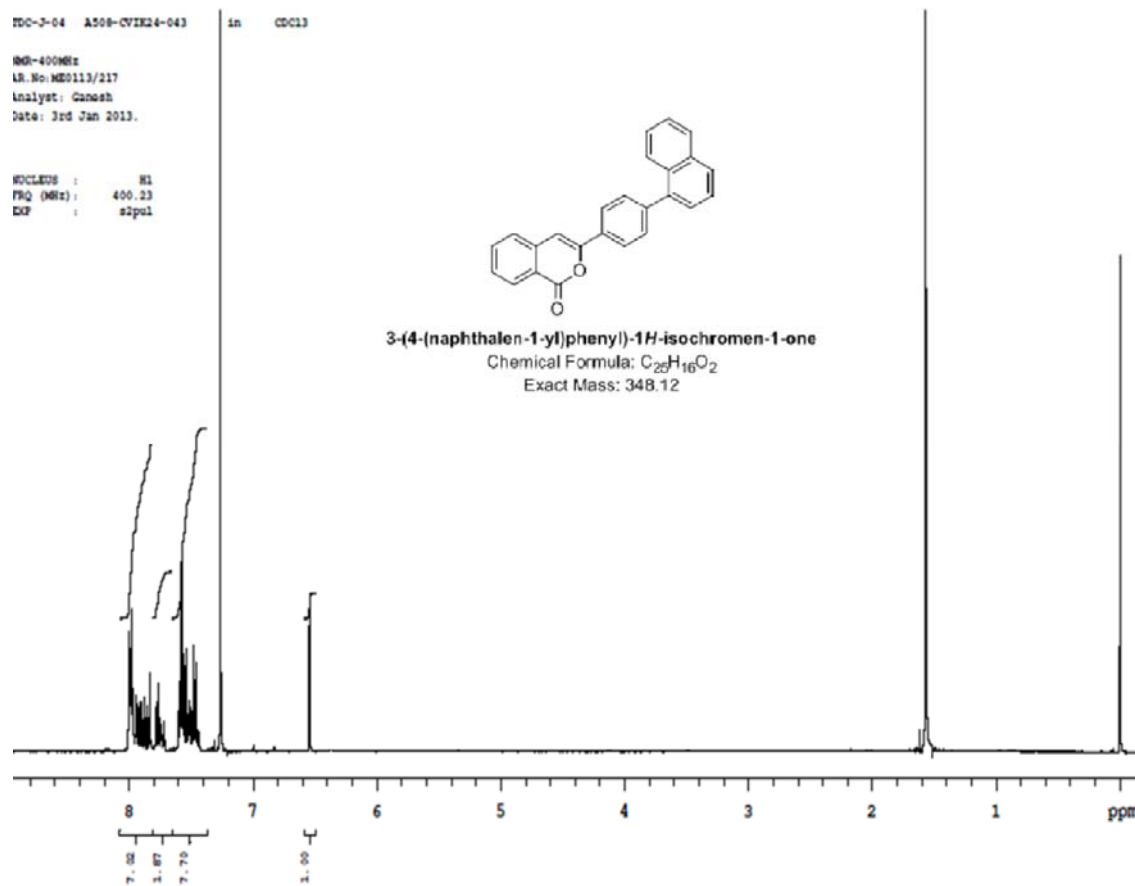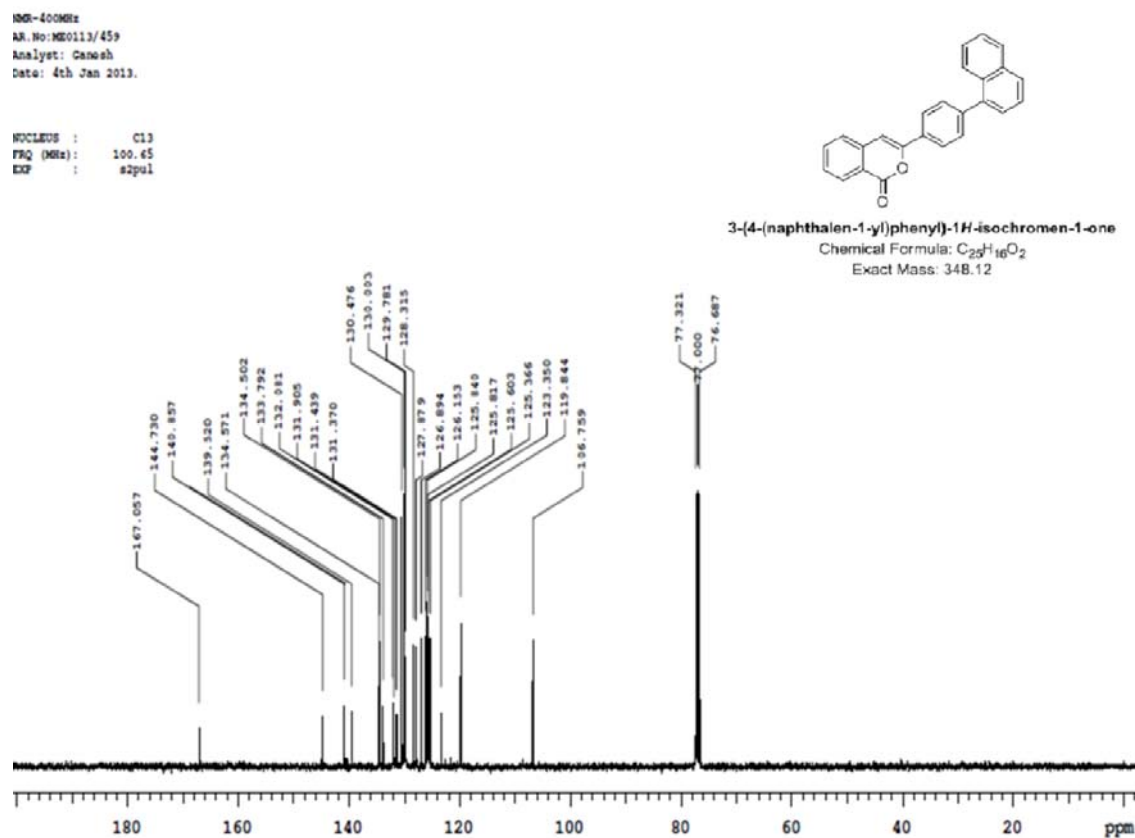

Elemental Composition Report

Page 1

Single Mass Analysis

Tolerance = 5.0 PPM / DBE: min = -1.5, max = 80.0  
 Element prediction: Off  
 Number of isotope peaks used for i-FIT = 3

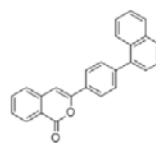

3-(4-(naphthalen-1-yl)phenyl)-1H-isochromen-1-one  
 Chemical Formula: C<sub>25</sub>H<sub>16</sub>O<sub>2</sub>  
 Exact Mass: 348.12

Monoisotopic Mass, Even Electron Ions  
 7 formula(e) evaluated with 1 results within limits (up to 8 best isotopic matches for each mass)  
 Elements Used:  
 C: 0-30 H: 0-25 O: 0-2  
 A508/CVIK24/D43  
 1: TOF MS ES+

130107011 11 (0.298) Cm (10:13)  
 6.30e+003

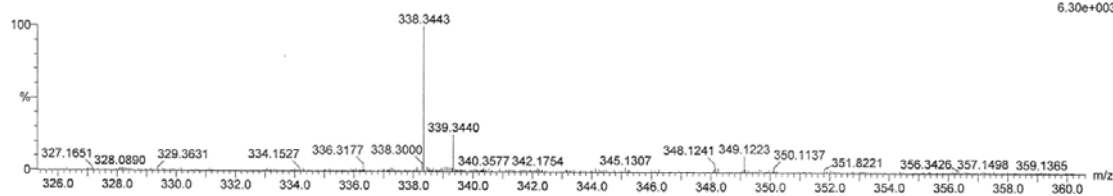

| Mass     | Calc. Mass | mDa  | PPM  | DBE  | i-PIT | Formula                                        |
|----------|------------|------|------|------|-------|------------------------------------------------|
| 349.1223 | 349.1229   | -0.6 | -1.7 | 17.5 | 19.9  | C <sub>25</sub> H <sub>17</sub> O <sub>2</sub> |

TDCJ-04 A508/CVIK26/026 in CDCl<sub>3</sub>

NMR-400MHz  
 AR.No:ME0313/2465  
 Analyst: Haribabu  
 Date: 27th March 2013

NUCLEUS : H1  
 FRQ (MHz): 400.23  
 EXP : s2pul

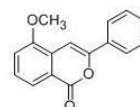

Chemical Formula: C<sub>16</sub>H<sub>12</sub>O<sub>3</sub>  
 Exact Mass: 252.08  
 Molecular Weight: 252.26

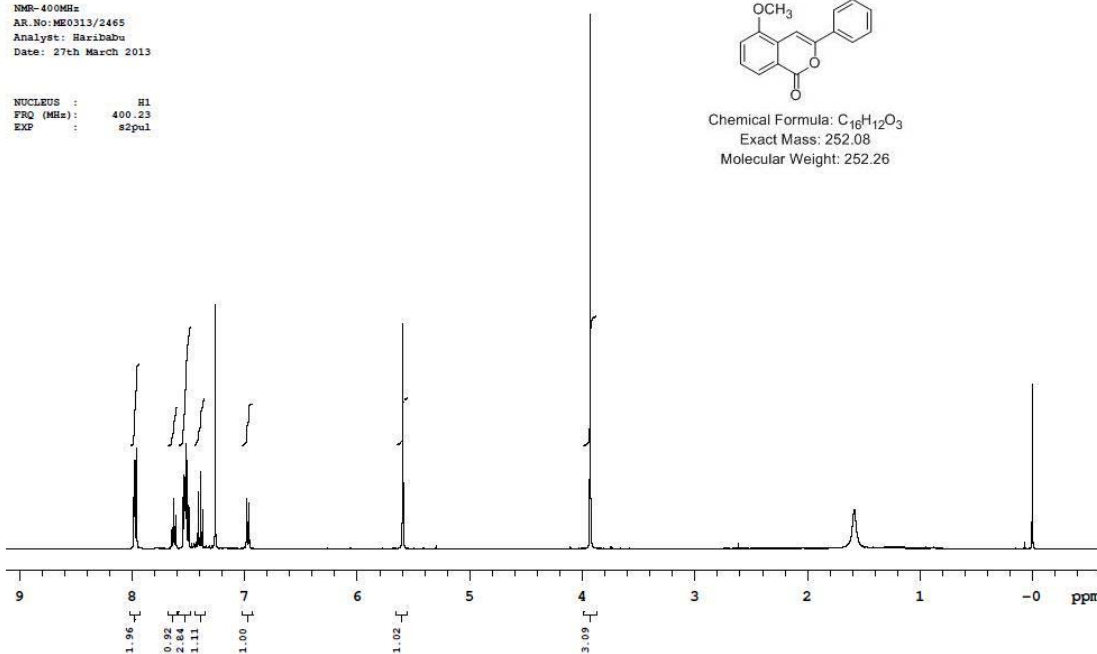

TDCJ-04 A508/CVIK26/026 in CDCl3

NMR-400MHz  
AR.No:ME0313/2670  
Analyst: Haribabu  
Date: 28th March 2013

NUCLEUS : C13  
FREQ (MHz) : 100.65  
EXP : s2pul

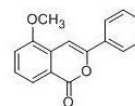

Chemical Formula: C<sub>16</sub>H<sub>12</sub>O<sub>3</sub>  
Exact Mass: 252.08  
Molecular Weight: 252.26

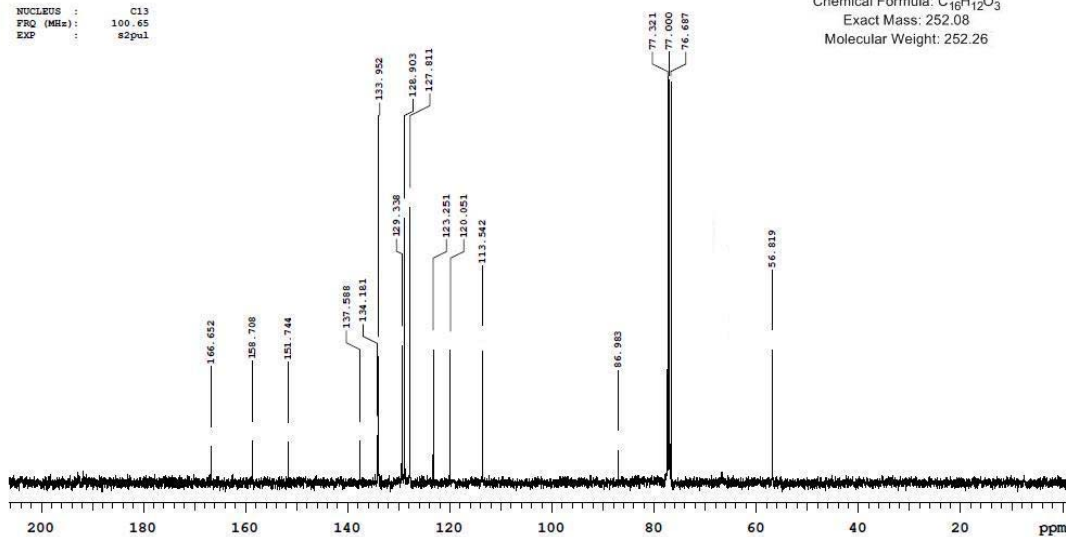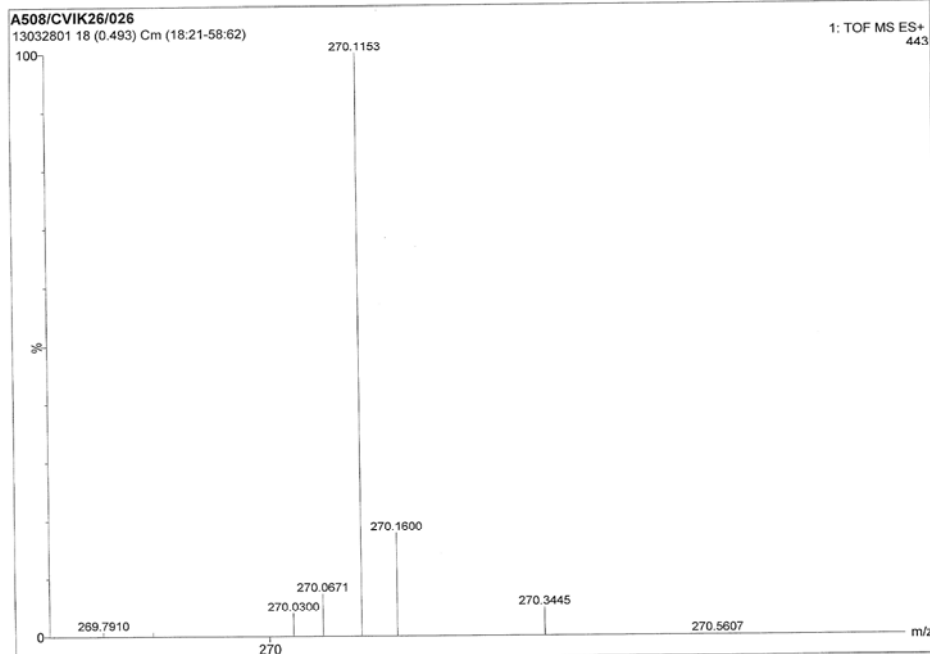



Elemental Composition Report

Single Mass Analysis

Tolerance = 10.0 PPM / DBE: min = -5.0, max = 80.0

Element prediction: Off

Number of isotope peaks used for i-FIT = 2

Monoisotopic Mass, Even Electron Ions

15 formula(e) evaluated with 1 results within limits (up to 5 closest results for each mass)

Elements Used:

C: 10-20 H: 10-20 N: 0-2 O: 1-5

A508/CVIK26/026

1: TOF MS ES+

13032801 18 (0.493) Cm (18.21-58.62)

4.43e+002

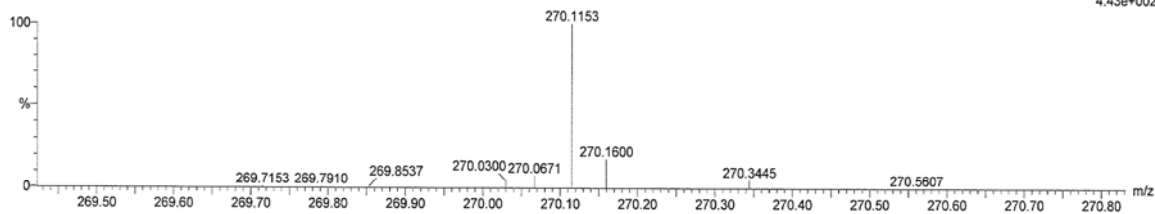

Minimum: -5.0  
Maximum: 5.0 10.0 80.0

| Mass     | Calc. Mass | mDa | PPM | DBE | i-FIT | Formula      |
|----------|------------|-----|-----|-----|-------|--------------|
| 270.1153 | 270.1130   | 2.3 | 8.5 | 9.5 | n/a   | C16 H16 N O3 |
